# Supplementary material for: Exosome-Related FTCD Facilitates M1 Macrophage Polarization and Impacts the Prognosis of Hepatocellular Carcinoma
Source: MDPI journal article supplement (doi:10.3390/biom14010041), 2023-12-28

**Figure S1** Ultrasound-guided intrahepatic injection.

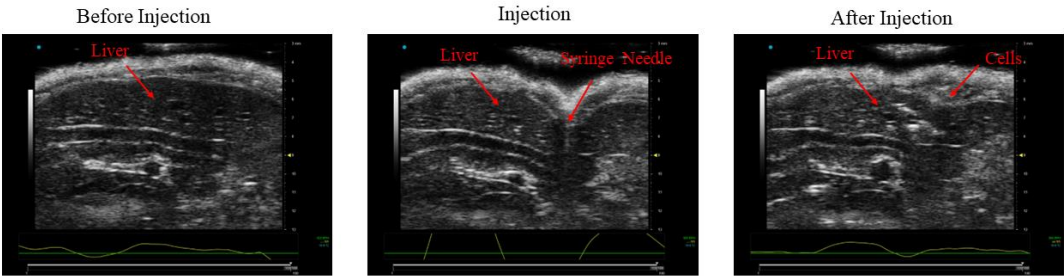

**Figure S2** Overall survival analysis. (A) C6. (B) C8A. (C) PLG. (D) ALDH8A1. (E) FGA. (F) ANG. (G) KLKB1.  $P < 0.05$  was considered as statistically significant.

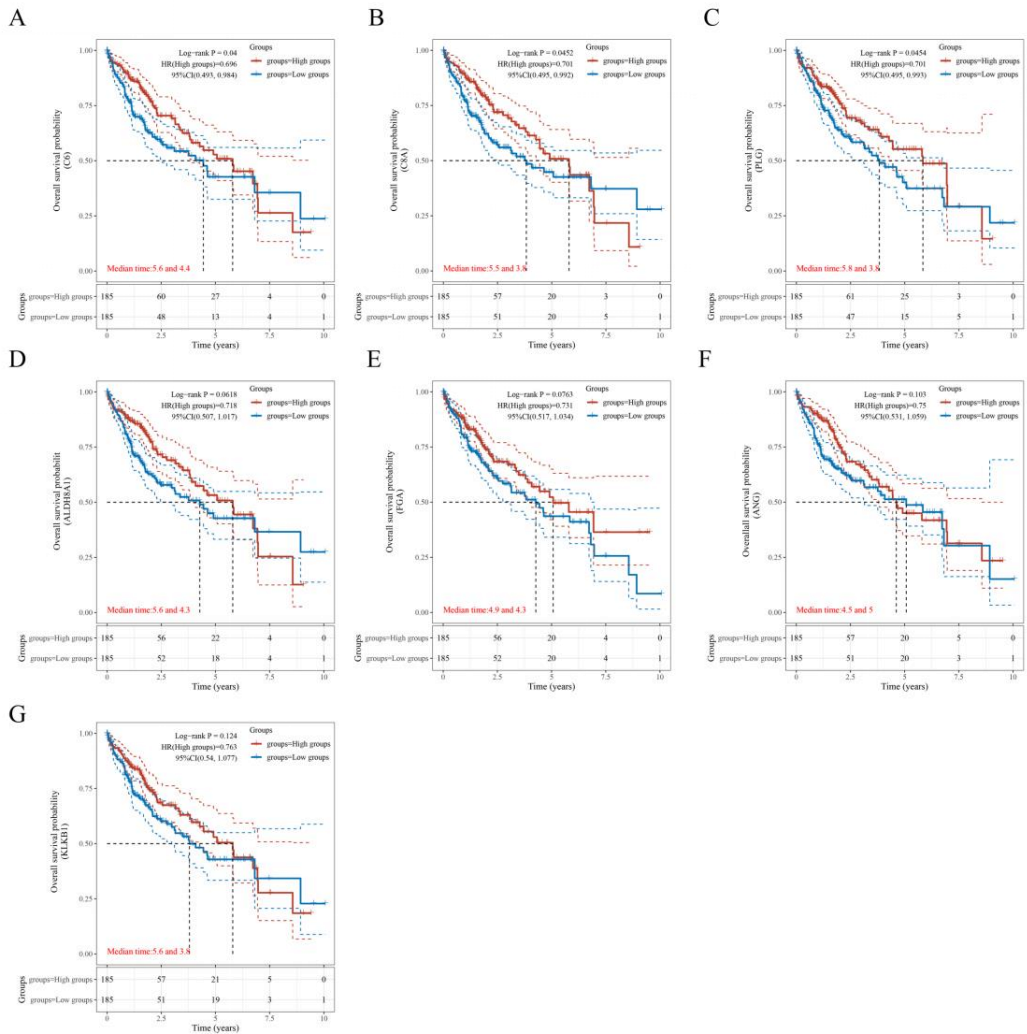

**Figure S3** The expression of FTCD in different cell types within liver cancer tissues

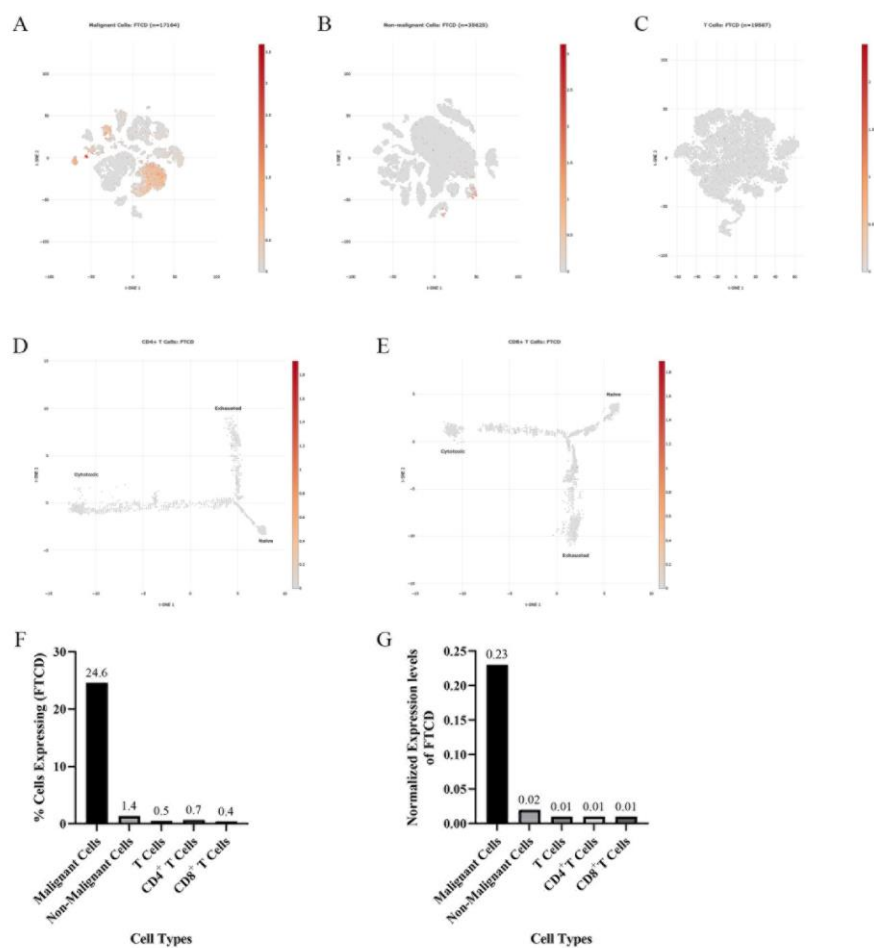

**Figure S4** The original image of the exosome detection using western blot. Exosomes were obtained from Hepa1-6 cells (left) and AML12 (right).

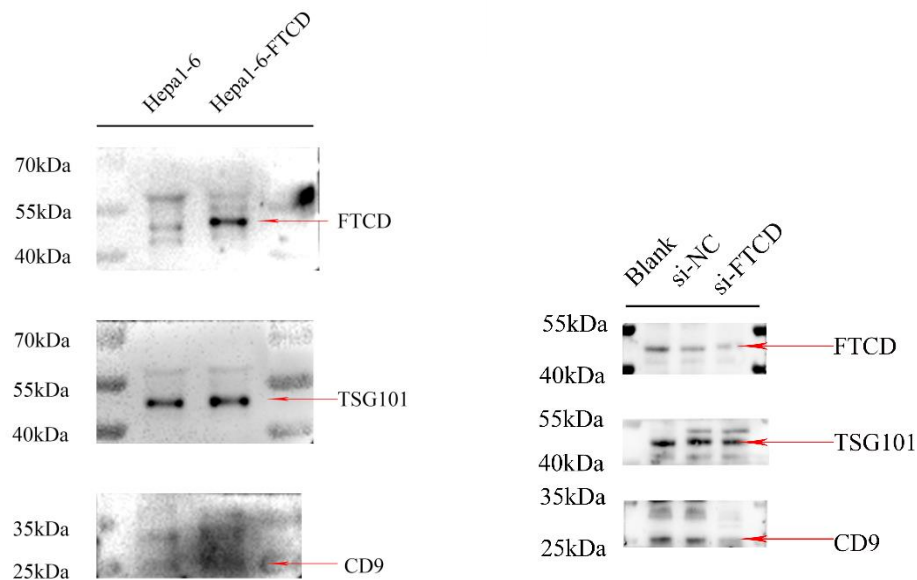

**Figure S5** The original image of the detection of the expression of key enzymes in glycolysis progression using western blot.

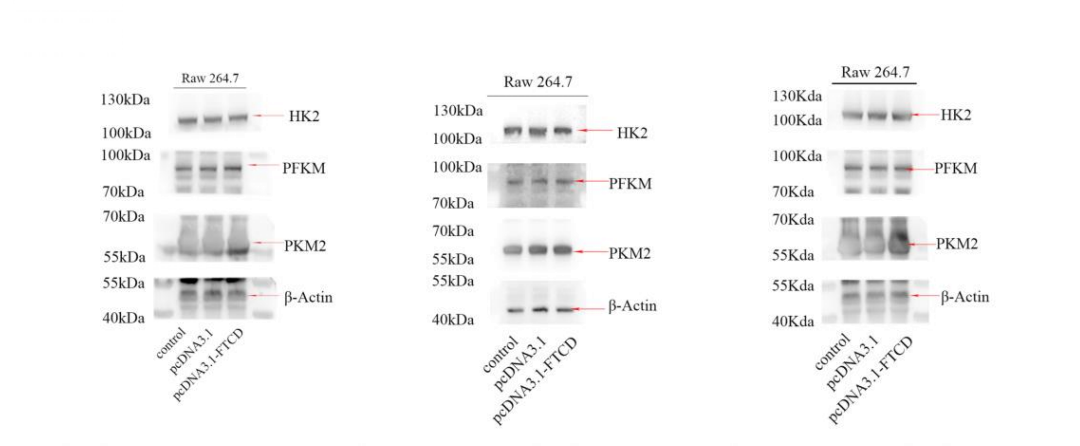

Supplement: s1 [file s1]
