# Supplementary material for: Exosome-Related FTCD Facilitates M1 Macrophage Polarization and Impacts the Prognosis of Hepatocellular Carcinoma
Source: MDPI journal article supplement (doi:10.3390/biom14010041), 2023-12-28
Supplement: s1 [file s1]

**Table S5** Hub genes with highest degree of connectivity.

| Rank | Name    | Degree |
|------|---------|--------|
| 1    | FTCD    | 19     |
| 2    | FGA     | 18     |
| 3    | PLG     | 18     |
| 4    | HRG     | 18     |
| 5    | C8A     | 17     |
| 6    | KLKB1   | 15     |
| 7    | ANG     | 15     |
| 8    | C6      | 14     |
| 9    | ALDH8A1 | 14     |
| 10   | C8B     | 14     |
