# Supplementary material for: Exosome-Related FTCD Facilitates M1 Macrophage Polarization and Impacts the Prognosis of Hepatocellular Carcinoma
Source: MDPI journal article supplement (doi:10.3390/biom14010041), 2023-12-28
Supplement: s1 [file s1]

**Table S3** The 83 exosome-related DEGs

| Gene name | log2 FC | <i>P</i> value |
|-----------|---------|----------------|
| NQO1      | 1.85    | 4.86667E-06    |
| RACGAP1   | 1.59    | 4.2E-11        |
| S100P     | 1.56    | 0.000253958    |
| THY1      | 1.42    | 1.35333E-11    |
| ACSL4     | 2.61    | 6.10008E-12    |
| AKR1B10   | 3.35    | 2.62E-08       |
| AKR1C3    | 1.60    | 5.83333E-09    |
| CPD       | 1.16    | 2.20018E-12    |
| COL15A1   | 2.01    | 2.92667E-18    |
| GPC3      | 3.73    | 8.36667E-14    |
| HSPB1     | 1.30    | 6.4E-11        |
| LCN2      | 2.19    | 0.0000048      |
| LYZ       | 1.67    | 1.01335E-05    |
| PLCB1     | 1.49    | 3.56667E-12    |
| PODXL     | 1.34    | 6.12367E-15    |
| SPP1      | 2.03    | 1.07E-07       |
| TXNRD1    | 1.44    | 5.86667E-09    |
| TKT       | 1.57    | 6.06667E-09    |
| TP53I3    | 1.48    | 1.25E-11       |
| HPD       | -1.92   | 0.000323       |
| CXCL12    | -2.32   | 7.56667E-17    |
| PZP       | -1.38   | 8.81253E-17    |
| RND3      | -1.93   | 1.47E-15       |
| ACAA2     | -1.17   | 4.06667E-10    |
| AFM       | -2.28   | 1.43E-07       |
| ADH6      | -1.29   | 1.89333E-07    |
| ALDH6A1   | -1.37   | 0.0000001      |
| ALDH8A1   | -1.40   | 3.73333E-07    |
| AKR1D1    | -2.97   | 2.46E-08       |
| AKR7A3    | -1.53   | 3.15333E-11    |
| ANG       | -1.15   | 3.30013E-06    |
| ARG1      | -1.32   | 0.002156667    |
| ASS1      | -1.82   | 3.12667E-15    |
| BHMT      | -1.97   | 1.45667E-05    |
| CDHR2     | -2.01   | 4.66667E-25    |
| CA2       | -2.12   | 2.22333E-09    |
| SLC39A5   | -1.17   | 5.66688E-12    |
| CETP      | -2.06   | 4.06667E-16    |
| CLRN3     | -2.50   | 1.60763E-14    |
| F9        | -1.96   | 4.83333E-05    |
| C1R       | -1.26   | 2.03333E-08    |

|         |       |             |
|---------|-------|-------------|
| C6      | -2.13 | 1.72333E-06 |
| C7      | -2.25 | 1.17333E-11 |
| C8A     | -1.56 | 5.73333E-08 |
| C8B     | -1.41 | 6.53333E-06 |
| C9      | -3.44 | 0.00000049  |
| CFHR3   | -1.70 | 2.76667E-06 |
| CTH     | -1.51 | 1.28E-06    |
| CYP4A11 | -1.56 | 4.3E-14     |
| DEFB1   | -1.43 | 0.001016667 |
| DPYS    | -1.17 | 6.66801E-05 |
| ENO3    | -1.87 | 1.54667E-15 |
| EPHX2   | -1.31 | 1.12333E-09 |
| ECM1    | -1.65 | 1.65667E-24 |
| FGA     | -1.18 | 1.88334E-11 |
| FCN2    | -2.76 | 2.27E-23    |
| FTCD    | -1.52 | 1.10333E-09 |
| FBP1    | -2.48 | 2.68E-10    |
| BBOX1   | -2.70 | 1.22515E-13 |
| GSTA1   | -1.10 | 0.001573335 |
| GLYAT   | -1.91 | 3.8E-13     |
| HBB     | -1.66 | 2.26E-08    |
| HPX     | -1.59 | 6.2E-05     |
| HRG     | -1.64 | 0.000986667 |
| HAO2    | -2.49 | 1.48667E-11 |
| IGFBP3  | -1.84 | 5.36667E-17 |
| IGFALS  | -1.87 | 3.5E-27     |
| KLKB1   | -1.74 | 1.23333E-11 |
| KMO     | -2.24 | 3.6E-15     |
| LCAT    | -2.51 | 3.3E-20     |
| MASP2   | -1.46 | 3.29E-08    |
| PON1    | -1.32 | 5.80018E-07 |
| PTH1R   | -1.27 | 3.43333E-20 |
| PGLYRP2 | -2.47 | 5.26667E-10 |
| PCK1    | -2.59 | 0.000228    |
| PHGDH   | -1.46 | 6.86667E-14 |
| PLG     | -1.69 | 2.45483E-09 |
| PROZ    | -1.45 | 1.17334E-12 |
| TMEM27  | -2.41 | 7.13333E-18 |
| SPP2    | -2.60 | 1.15333E-06 |
| SPINK1  | 3.86  | 4.46667E-09 |
| SHBG    | -1.42 | 1.5E-15     |
| SLC27A2 | -1.53 | 6.06667E-05 |

---

**Notes:**

**Abbreviations:** DEGs, differentially expressed genes.
