# Supplementary material for: Exosome-Related FTCD Facilitates M1 Macrophage Polarization and Impacts the Prognosis of Hepatocellular Carcinoma
Source: MDPI journal article supplement (doi:10.3390/biom14010041), 2023-12-28
Supplement: s1 [file s1]

**Table S1** Primers and siRNAs used in the study.

| Gene ID        |                    | Sequence (5'-3')          |
|----------------|--------------------|---------------------------|
| $\beta$ -actin | Forward            | CATCCGTAAAGACCTCTATGCCAAC |
|                | Reverse            | ATGGAGCCACCGATCCACA       |
| FTCD           | Forward            | ACAGCCTCTTGAGAGGAACC      |
|                | Reverse            | GATGGCATCAATCACCTCCTG     |
| HRG            | Forward            | CTGCACCACAAGTTCTGTCTC     |
|                | Reverse            | ACTTGTCCAGGGCTTTACGG      |
| C8B            | Forward            | GTGGATGGCGTTATGGATCTTG    |
|                | Reverse            | GTGGAGGAACTTGCTTTGAGTG    |
| si-FTCD-1      | Sense Sequence     | UUUAUUGCCUCCAAACAGGCA     |
|                | Antisense Sequence | CCUGUUUGGAGGCAAUAAAGC     |
| si-FTCD-2      | Sense Sequence     | GGACAUGACGGAUGAUGUAUU     |
|                | Antisense Sequence | UACAUCAUCCGUCAUGUCCUU     |
| si-FTCD-3      | Sense Sequence     | GACGGAUGAUGUAUUUAAAGA     |
|                | Antisense Sequence | UUUAAAUACAUCAUCCGUCAU     |
