# Supplementary material for: Exosome-Related FTCD Facilitates M1 Macrophage Polarization and Impacts the Prognosis of Hepatocellular Carcinoma
Source: MDPI journal article supplement (doi:10.3390/biom14010041), 2023-12-28
Supplement: s1 [file s1]

**Table S2** The DEGs shared in GSE36376, GSE55092, and GSE121248 datasets

|                            | Gene name                                                                                                                                                                                                                                                                                                                                                                                                                                                                                                                                                                                                                                                                                                                                                                                                                                                                                                                                                                                                                                                                                                        |
|----------------------------|------------------------------------------------------------------------------------------------------------------------------------------------------------------------------------------------------------------------------------------------------------------------------------------------------------------------------------------------------------------------------------------------------------------------------------------------------------------------------------------------------------------------------------------------------------------------------------------------------------------------------------------------------------------------------------------------------------------------------------------------------------------------------------------------------------------------------------------------------------------------------------------------------------------------------------------------------------------------------------------------------------------------------------------------------------------------------------------------------------------|
| Up-regulated Genes (55)    | SPINK1 TKT HSPB1 S100P CCDC34 AKR1B10 SMYD3<br>COL15A1 RACGAP1 COX7B2 AURKA MCM3 CPD THY1<br>CCL20 SPP1 SQLE MELK PODXL CDC20 RFC4 PTTG1<br>TP53I3 RGS5 ASPM TBCE PLCB1 SRXN1 UBE2C NQO1<br>STXBP6 CCNB2 PRC1 TOP2A FEN1 TXNRD1 CNIH4<br>PSMD4 DKK1 COL4A1 CAP2 TOMM40L HMMR LYZ GPC3<br>MCM6 RRAGD LCN2 AKR1C3 PEG10 KIAA0101 CDKN3<br>NCAPG ACSL4 NUSAP1                                                                                                                                                                                                                                                                                                                                                                                                                                                                                                                                                                                                                                                                                                                                                       |
| Down-regulated Genes (174) | CYP26A1 BBOX1 ACOT12 GSTA1 IGF1 CYP39A1 C1R<br>FAM134B PROZ C8A HRG ZG16 MBL2 RCL1 SLC01B3<br>DEFB1 ACSM3 GHR CLEC1B BHMT PON1 STEAP3 SHBG<br>ATOH8 DNASE1L3 PLIN2 BCHE CPEB3 C8orf4 HAO1 ID1<br>CRHBP ASS1 F9 IGFALS PHLDA1 SLC38A4 DBH MT1M<br>SLC39A5 SRD5A2 EGR1 ECM1 AKR7A3 CYP4V2 FCN2<br>KLKB1 MT1G CYP2A6 PGLYRP2 SLC22A1 ALDH6A1<br>APOA5 CHST4 RCAN1 PANK1 PHGDH ARG1 KBTBD11<br>PCK1 ADH1C DPYS CYP2C9 CYP2A7 CYP2E1 CTH RND3<br>IL1RAP RDH16 ANG DMGDH TMEM27 AFM CSRN1<br>THRSP CYP4A11 AGXT2 MT1X ACAA2 C7 AADAT NNMT<br>CPED1 EPHX2 APOF FAM13A ACSM5 SLC7A2 SDS<br>ETNPPL HPD SLC25A47 SKAP1 SLC10A1 CYP1A2 MT1E<br>ANXA10 TTC36 C8B TAT CYP4F2 FGA FOS ALDH8A1<br>NAT2 MASP2 AKR1D1 PAMR1 GNMT CXCL12 ACSL1<br>ACAA1 CA2 FBP1 ADH4 OIT3 GLYAT ADH1A CETP INMT<br>HBB ENO3 LECT2 PLG SOCS2 SLC13A5 SPP2 HAO2 MT1F<br>ADH1B LIPC GSTZ1 LY6E CPS1 CNDP1 FCN3 ACACB<br>GBA3 CLEC4G FXYD1 HPX KMO FOSB SLC27A2 CLRN3<br>CFHR3 MARCO ADH6 MT1H LCAT TDO2 VIPR1 IGFBP3<br>PLAC8 HAMP CYP8B1 FTCD CIDEB HGFAC PTH1R MT2A<br>ADGRG7 ZGPAT OGDHL PZP CYR61 HSD17B6 CYP3A4<br>SLC27A5 GLS2 C6 C9 CDHR2 OAT |

**Notes:****Abbreviations:** DEGs, differentially expressed genes.
