# Supplementary material for: Exosome-Related FTCD Facilitates M1 Macrophage Polarization and Impacts the Prognosis of Hepatocellular Carcinoma
Source: Biomolecules. 2023 Dec 28;14(1):41. doi: 10.3390/biom14010041 (PMC10813691; doi:10.3390/biom14010041)
Supplement: Supplementary file 1 [file biomolecules-14-00041-s001.zip]

Archive with 8 entries (8 files):
- Supplementary Figures.pdf
- Table S1 Primers and siRNAs used in the study.pdf
- Table S2 The DEGs shared in GSE36376, GSE55092, and GSE121248 datasets.pdf
- Table S3 The 83 exosome-related DEGs.pdf
- Table S4 PPI network information of the exosome-related DEGs.tsv
- Table S5 Hub genes with highest degree of conecticity.pdf
- Table S6 PPI network information of the top 10 genes.tsv
- Table S7 The clinical background data and gene expression value of HCC obtained from TCGA dataset.csv
