# Supplementary material for: Exosome-Related FTCD Facilitates M1 Macrophage Polarization and Impacts the Prognosis of Hepatocellular Carcinoma
Source: Biomolecules. 2023 Dec 28;14(1):41. doi: 10.3390/biom14010041 (PMC10813691; doi:10.3390/biom14010041)
Supplement: Supplementary file 1 [file biomolecules-14-00041-s001.zip › Table S4 PPI network information of the exosome-related DEGs.tsv]

#node1	node2	node1_string_id	node2_string_id	neighborhood_on_chromosome	gene_fusion	phylogenetic_cooccurrence	homology	coexpression	experimentally_determined_interaction	database_annotated	automated_textmining	combined_score
ALDH8A1	FTCD	9606.ENSP00000265605	9606.ENSP00000380856	0	0	0	0	0.428	0	0	0.123	0.477
ANG	PLG	9606.ENSP00000336762	9606.ENSP00000308938	0	0	0	0	0.044	0	0	0.559	0.560
C6	FGA	9606.ENSP00000263413	9606.ENSP00000498441	0	0	0	0	0.270	0	0	0.282	0.454
C6	C8B	9606.ENSP00000263413	9606.ENSP00000360281	0	0	0	0.778	0.213	0.800	0.900	0.137	0.984
C6	C8A	9606.ENSP00000263413	9606.ENSP00000354458	0	0	0	0.805	0.277	0.800	0.900	0.118	0.985
C8A	HRG	9606.ENSP00000354458	9606.ENSP00000232003	0	0	0	0	0.329	0.045	0	0.308	0.517
C8A	PLG	9606.ENSP00000354458	9606.ENSP00000308938	0	0	0	0	0.407	0	0	0.171	0.488
C8A	FTCD	9606.ENSP00000354458	9606.ENSP00000380856	0	0	0	0	0.218	0	0	0.478	0.574
C8A	FGA	9606.ENSP00000354458	9606.ENSP00000498441	0	0	0	0	0.607	0	0	0.397	0.753
C8A	C8B	9606.ENSP00000354458	9606.ENSP00000360281	0	0	0.074	0.830	0.785	0.900	0.900	0.836	0.999
C8B	HRG	9606.ENSP00000360281	9606.ENSP00000232003	0	0	0	0	0.363	0.089	0	0.196	0.493
C8B	FGA	9606.ENSP00000360281	9606.ENSP00000498441	0	0	0	0	0.425	0	0	0.325	0.595
FGA	HRG	9606.ENSP00000498441	9606.ENSP00000232003	0	0	0	0	0.600	0.312	0	0.788	0.936
FGA	KLKB1	9606.ENSP00000498441	9606.ENSP00000264690	0	0	0	0	0.131	0	0	0.418	0.473
FGA	PLG	9606.ENSP00000498441	9606.ENSP00000308938	0	0	0	0	0.837	0	0	0.799	0.965
FGA	FTCD	9606.ENSP00000498441	9606.ENSP00000380856	0	0	0	0	0.713	0	0	0.134	0.741
FTCD	HRG	9606.ENSP00000380856	9606.ENSP00000232003	0	0	0	0	0.425	0	0	0.126	0.477
FTCD	PLG	9606.ENSP00000380856	9606.ENSP00000308938	0	0	0	0	0.477	0	0	0	0.477
HRG	KLKB1	9606.ENSP00000232003	9606.ENSP00000264690	0	0	0	0	0.179	0.094	0	0.502	0.597
HRG	PLG	9606.ENSP00000232003	9606.ENSP00000308938	0	0	0	0	0.781	0.094	0.900	0.997	0.999
KLKB1	PLG	9606.ENSP00000264690	9606.ENSP00000308938	0	0	0.104	0.637	0.157	0	0.900	0.260	0.936
