# Supplementary material for: Exosome-Related FTCD Facilitates M1 Macrophage Polarization and Impacts the Prognosis of Hepatocellular Carcinoma
Source: Biomolecules. 2023 Dec 28;14(1):41. doi: 10.3390/biom14010041 (PMC10813691; doi:10.3390/biom14010041)
Supplement: Supplementary file 1 [file biomolecules-14-00041-s001.zip › Table S6 PPI network information of the top 10 genes.tsv]

#node1	node2	node1_string_id	node2_string_id	neighborhood_on_chromosome	gene_fusion	phylogenetic_cooccurrence	homology	coexpression	experimentally_determined_interaction	database_annotated	automated_textmining	combined_score
ACAA2	ALDH8A1	9606.ENSP00000285093	9606.ENSP00000265605	0	0	0	0	0.105	0.046	0.214	0.233	0.417
ACAA2	SLC27A2	9606.ENSP00000285093	9606.ENSP00000267842	0	0	0	0	0.050	0	0	0.467	0.472
ACAA2	PCK1	9606.ENSP00000285093	9606.ENSP00000319814	0	0	0	0	0.104	0	0	0.365	0.406
ACAA2	ASS1	9606.ENSP00000285093	9606.ENSP00000361471	0	0	0	0	0.066	0	0	0.407	0.423
ACAA2	FBP1	9606.ENSP00000285093	9606.ENSP00000408025	0	0	0	0	0.169	0	0	0.360	0.445
ACAA2	ACSL4	9606.ENSP00000285093	9606.ENSP00000339787	0.057	0	0	0	0.110	0.066	0	0.431	0.495
ACAA2	TKT	9606.ENSP00000285093	9606.ENSP00000391481	0	0	0	0	0.112	0.209	0	0.361	0.513
ACAA2	ENO3	9606.ENSP00000285093	9606.ENSP00000324105	0	0	0	0	0.117	0	0	0.472	0.514
ACAA2	ALDH6A1	9606.ENSP00000285093	9606.ENSP00000450436	0	0	0	0	0.182	0.100	0.900	0.494	0.957
ACSL4	SLC27A2	9606.ENSP00000339787	9606.ENSP00000267842	0	0	0	0	0	0.106	0	0.827	0.839
ADH6	ALDH8A1	9606.ENSP00000378359	9606.ENSP00000265605	0.048	0	0	0	0.115	0	0.197	0.400	0.540
ADH6	GSTA1	9606.ENSP00000378359	9606.ENSP00000335620	0	0	0	0	0.122	0.070	0.650	0.202	0.741
ADH6	AKR1B10	9606.ENSP00000378359	9606.ENSP00000352584	0	0	0	0	0.110	0.076	0	0.347	0.416
ADH6	HAO2	9606.ENSP00000378359	9606.ENSP00000354314	0.054	0	0	0	0.196	0	0	0.277	0.402
ADH6	ALDH6A1	9606.ENSP00000378359	9606.ENSP00000450436	0	0	0	0	0.115	0	0	0.358	0.408
AFM	SPP2	9606.ENSP00000226355	9606.ENSP00000168148	0	0	0	0	0.296	0	0	0.244	0.445
AFM	F9	9606.ENSP00000226355	9606.ENSP00000218099	0	0	0	0	0.487	0.048	0	0.104	0.524
AFM	PON1	9606.ENSP00000226355	9606.ENSP00000222381	0	0	0	0	0.279	0	0	0.322	0.490
AFM	SHBG	9606.ENSP00000226355	9606.ENSP00000369816	0	0	0	0	0.127	0	0	0.368	0.424
AFM	MASP2	9606.ENSP00000226355	9606.ENSP00000383690	0	0	0	0	0.422	0.048	0	0.119	0.473
AFM	C8B	9606.ENSP00000226355	9606.ENSP00000360281	0	0	0	0	0.366	0	0	0.211	0.478
AFM	C9	9606.ENSP00000226355	9606.ENSP00000263408	0	0	0	0	0.292	0	0	0.370	0.535
AFM	C8A	9606.ENSP00000226355	9606.ENSP00000354458	0	0	0	0	0.391	0	0	0.281	0.544
AFM	PGLYRP2	9606.ENSP00000226355	9606.ENSP00000292609	0	0	0	0	0.118	0	0	0.508	0.547
AFM	HPX	9606.ENSP00000226355	9606.ENSP00000265983	0	0	0	0	0.192	0.069	0	0.453	0.553
AFM	PLG	9606.ENSP00000226355	9606.ENSP00000308938	0	0	0	0	0.532	0.048	0	0.252	0.637
AFM	HRG	9606.ENSP00000226355	9606.ENSP00000232003	0	0	0	0	0.618	0	0	0.432	0.774
AKR1B10	AKR1D1	9606.ENSP00000352584	9606.ENSP00000242375	0	0	0.069	0.942	0	0.440	0	0.066	0.470
AKR1B10	NQO1	9606.ENSP00000352584	9606.ENSP00000319788	0.057	0	0	0	0.257	0	0	0.515	0.630
AKR1B10	TXNRD1	9606.ENSP00000352584	9606.ENSP00000434516	0	0	0	0	0.168	0.046	0	0.442	0.519
AKR1B10	AKR7A3	9606.ENSP00000352584	9606.ENSP00000355377	0.054	0	0	0	0.209	0	0.183	0.552	0.690
AKR1B10	AKR1C3	9606.ENSP00000352584	9606.ENSP00000369927	0	0	0.075	0.931	0.214	0	0.900	0.101	0.925
AKR1C3	AKR1D1	9606.ENSP00000369927	9606.ENSP00000242375	0	0	0.062	0.957	0.079	0.831	0.900	0.064	0.983
AKR1C3	NQO1	9606.ENSP00000369927	9606.ENSP00000319788	0.057	0	0	0	0.196	0	0	0.475	0.567
AKR1C3	AKR7A3	9606.ENSP00000369927	9606.ENSP00000355377	0.054	0	0	0	0.208	0	0.183	0.425	0.600
AKR1C3	TXNRD1	9606.ENSP00000369927	9606.ENSP00000434516	0	0	0	0	0.104	0.046	0	0.376	0.420
AKR1D1	AKR7A3	9606.ENSP00000242375	9606.ENSP00000355377	0.054	0	0	0	0.192	0	0.183	0.545	0.677
AKR1D1	GLYAT	9606.ENSP00000242375	9606.ENSP00000340200	0	0	0	0	0.625	0	0	0.414	0.771
AKR7A3	NQO1	9606.ENSP00000355377	9606.ENSP00000319788	0.077	0	0	0	0.049	0	0	0.515	0.537
ALDH6A1	ALDH8A1	9606.ENSP00000450436	9606.ENSP00000265605	0	0	0.084	0.778	0.071	0.622	0	0.226	0.718
ALDH8A1	HPD	9606.ENSP00000265605	9606.ENSP00000289004	0.041	0	0	0	0.290	0	0.108	0.145	0.411
ALDH8A1	CYP4A11	9606.ENSP00000265605	9606.ENSP00000311095	0	0	0	0	0.176	0.045	0.138	0.294	0.457
ALDH8A1	FTCD	9606.ENSP00000265605	9606.ENSP00000380856	0	0	0	0	0.428	0	0	0.123	0.477
ALDH8A1	HAO2	9606.ENSP00000265605	9606.ENSP00000354314	0.041	0.004	0	0	0.280	0	0.248	0.134	0.490
ALDH8A1	KMO	9606.ENSP00000265605	9606.ENSP00000355517	0	0	0	0	0.315	0	0.218	0.156	0.509
ALDH8A1	EPHX2	9606.ENSP00000265605	9606.ENSP00000430269	0.053	0	0	0	0.109	0	0.761	0.211	0.819
ANG	PLG	9606.ENSP00000336762	9606.ENSP00000308938	0	0	0	0	0.044	0	0	0.559	0.560
ARG1	BBOX1	9606.ENSP00000349446	9606.ENSP00000263182	0	0	0	0	0.064	0	0.428	0.049	0.446
ARG1	LCN2	9606.ENSP00000349446	9606.ENSP00000362108	0	0	0	0	0.139	0	0	0.350	0.416
ARG1	CTH	9606.ENSP00000349446	9606.ENSP00000359976	0.097	0	0	0	0.066	0	0	0.423	0.472
ARG1	GPC3	9606.ENSP00000349446	9606.ENSP00000377836	0	0	0	0	0	0	0	0.478	0.478
ARG1	CXCL12	9606.ENSP00000349446	9606.ENSP00000379140	0	0	0	0	0.067	0	0	0.521	0.533
ARG1	ASS1	9606.ENSP00000349446	9606.ENSP00000361471	0	0	0	0	0.067	0	0	0.806	0.811
ASS1	BHMT	9606.ENSP00000361471	9606.ENSP00000274353	0.042	0	0	0	0.079	0	0	0.455	0.477
ASS1	CTH	9606.ENSP00000361471	9606.ENSP00000359976	0.060	0	0	0	0.131	0.115	0	0.520	0.607
ASS1	TKT	9606.ENSP00000361471	9606.ENSP00000391481	0	0	0	0	0.201	0.166	0	0.332	0.516
ASS1	TXNRD1	9606.ENSP00000361471	9606.ENSP00000434516	0.054	0	0	0	0.068	0	0	0.496	0.517
ASS1	PHGDH	9606.ENSP00000361471	9606.ENSP00000493382	0.057	0	0	0	0.303	0.183	0	0.558	0.731
ASS1	FTCD	9606.ENSP00000361471	9606.ENSP00000380856	0	0	0	0	0.111	0	0.800	0.352	0.875
BHMT	PCK1	9606.ENSP00000274353	9606.ENSP00000319814	0	0	0	0	0.142	0	0	0.340	0.410
BHMT	DPYS	9606.ENSP00000274353	9606.ENSP00000276651	0.061	0	0	0	0.226	0	0	0.269	0.423
BHMT	TXNRD1	9606.ENSP00000274353	9606.ENSP00000434516	0	0	0	0	0	0	0.312	0.196	0.423
BHMT	FTCD	9606.ENSP00000274353	9606.ENSP00000380856	0.074	0	0	0	0.227	0	0	0.334	0.482
BHMT	HPD	9606.ENSP00000274353	9606.ENSP00000289004	0	0	0	0	0.280	0	0	0.336	0.502
BHMT	PHGDH	9606.ENSP00000274353	9606.ENSP00000493382	0	0	0	0	0.293	0	0	0.335	0.510
BHMT	CTH	9606.ENSP00000274353	9606.ENSP00000359976	0.115	0	0	0	0.363	0	0.931	0.783	0.990
C1R	C9	9606.ENSP00000444271	9606.ENSP00000263408	0	0	0	0	0.117	0	0	0.375	0.425
C1R	C6	9606.ENSP00000444271	9606.ENSP00000263413	0	0	0	0	0.134	0	0	0.407	0.465
C1R	FCN2	9606.ENSP00000444271	9606.ENSP00000291744	0	0	0	0	0	0	0.400	0.724	0.827
C1R	PLG	9606.ENSP00000444271	9606.ENSP00000308938	0	0	0	0.575	0.117	0	0	0.482	0.523
C1R	C7	9606.ENSP00000444271	9606.ENSP00000322061	0	0	0	0	0.138	0	0	0.392	0.454
C1R	C8A	9606.ENSP00000444271	9606.ENSP00000354458	0	0	0	0	0.107	0	0	0.597	0.625
C1R	CFHR3	9606.ENSP00000444271	9606.ENSP00000356395	0	0	0	0	0.082	0.046	0	0.398	0.427
C1R	C8B	9606.ENSP00000444271	9606.ENSP00000360281	0	0	0	0	0.090	0	0	0.663	0.681
C1R	CXCL12	9606.ENSP00000444271	9606.ENSP00000379140	0	0	0	0	0.245	0	0	0.444	0.562
C1R	MASP2	9606.ENSP00000444271	9606.ENSP00000383690	0	0	0.080	0.899	0.115	0	0.400	0.437	0.688
C6	SPP2	9606.ENSP00000263413	9606.ENSP00000168148	0	0	0	0	0.126	0	0	0.370	0.425
C6	C9	9606.ENSP00000263413	9606.ENSP00000263408	0	0	0	0.726	0.353	0.900	0.900	0.456	0.996
C6	FGA	9606.ENSP00000263413	9606.ENSP00000498441	0	0	0	0	0.270	0	0	0.282	0.454
C6	C8B	9606.ENSP00000263413	9606.ENSP00000360281	0	0	0	0.778	0.213	0.800	0.900	0.137	0.984
C6	C8A	9606.ENSP00000263413	9606.ENSP00000354458	0	0	0	0.805	0.277	0.800	0.900	0.118	0.985
C6	C7	9606.ENSP00000263413	9606.ENSP00000322061	0	0	0	0.804	0.221	0.900	0.900	0.465	0.995
C7	C9	9606.ENSP00000322061	9606.ENSP00000263408	0	0	0	0.716	0.228	0.800	0.900	0.247	0.986
C7	PLG	9606.ENSP00000322061	9606.ENSP00000308938	0	0	0	0	0.055	0.292	0	0.469	0.614
C7	IGFALS	9606.ENSP00000322061	9606.ENSP00000416683	0	0	0	0	0.117	0	0	0.370	0.419
C7	C8A	9606.ENSP00000322061	9606.ENSP00000354458	0	0	0	0.767	0.201	0.800	0.900	0.129	0.984
C7	C8B	9606.ENSP00000322061	9606.ENSP00000360281	0	0	0	0.733	0.123	0.900	0.900	0.145	0.991
C8A	SPP2	9606.ENSP00000354458	9606.ENSP00000168148	0	0	0	0	0.353	0	0	0.222	0.475
C8A	F9	9606.ENSP00000354458	9606.ENSP00000218099	0	0	0	0	0.402	0	0	0.176	0.486
C8A	HRG	9606.ENSP00000354458	9606.ENSP00000232003	0	0	0	0	0.329	0.045	0	0.308	0.517
C8A	C9	9606.ENSP00000354458	9606.ENSP00000263408	0	0	0	0.774	0.581	0.925	0.900	0.217	0.997
C8A	HPX	9606.ENSP00000354458	9606.ENSP00000265983	0	0	0	0	0.294	0	0	0.239	0.440
C8A	FCN2	9606.ENSP00000354458	9606.ENSP00000291744	0	0	0	0	0.112	0	0	0.499	0.536
C8A	PLG	9606.ENSP00000354458	9606.ENSP00000308938	0	0	0	0	0.407	0	0	0.171	0.488
C8A	CFHR3	9606.ENSP00000354458	9606.ENSP00000356395	0	0	0	0	0.106	0	0	0.413	0.453
C8A	MASP2	9606.ENSP00000354458	9606.ENSP00000383690	0	0	0	0	0.184	0	0	0.397	0.487
C8A	FTCD	9606.ENSP00000354458	9606.ENSP00000380856	0	0	0	0	0.218	0	0	0.478	0.574
C8A	FGA	9606.ENSP00000354458	9606.ENSP00000498441	0	0	0	0	0.607	0	0	0.397	0.753
C8A	C8B	9606.ENSP00000354458	9606.ENSP00000360281	0	0	0.074	0.830	0.785	0.900	0.900	0.836	0.999
C8B	F9	9606.ENSP00000360281	9606.ENSP00000218099	0	0	0	0	0.404	0	0	0.071	0.422
C8B	HRG	9606.ENSP00000360281	9606.ENSP00000232003	0	0	0	0	0.363	0.089	0	0.196	0.493
C8B	C9	9606.ENSP00000360281	9606.ENSP00000263408	0	0	0	0.732	0.396	0.806	0.900	0.242	0.989
C8B	CFHR3	9606.ENSP00000360281	9606.ENSP00000356395	0	0	0	0	0.097	0	0	0.398	0.433
C8B	MASP2	9606.ENSP00000360281	9606.ENSP00000383690	0	0	0	0	0.192	0	0	0.414	0.507
C8B	FGA	9606.ENSP00000360281	9606.ENSP00000498441	0	0	0	0	0.425	0	0	0.325	0.595
C9	F9	9606.ENSP00000263408	9606.ENSP00000218099	0	0	0	0	0.490	0	0	0.286	0.620
C9	PON1	9606.ENSP00000263408	9606.ENSP00000222381	0	0	0	0	0.329	0	0	0.247	0.473
C9	HRG	9606.ENSP00000263408	9606.ENSP00000232003	0	0	0	0	0.411	0.045	0	0.275	0.557
C9	KLKB1	9606.ENSP00000263408	9606.ENSP00000264690	0	0	0	0	0.191	0	0	0.323	0.429
C9	MASP2	9606.ENSP00000263408	9606.ENSP00000383690	0	0	0	0	0.309	0	0	0.212	0.432
C9	HPX	9606.ENSP00000263408	9606.ENSP00000265983	0	0	0	0	0.454	0	0	0.376	0.645
C9	FGA	9606.ENSP00000263408	9606.ENSP00000498441	0	0	0	0	0.611	0	0	0.336	0.731
C9	PLG	9606.ENSP00000263408	9606.ENSP00000308938	0	0	0	0	0.584	0	0	0.438	0.757
CETP	PLG	9606.ENSP00000200676	9606.ENSP00000308938	0	0	0	0	0.227	0	0	0.274	0.415
CETP	PON1	9606.ENSP00000200676	9606.ENSP00000222381	0	0	0	0	0.049	0	0.720	0.890	0.968
CETP	LCAT	9606.ENSP00000200676	9606.ENSP00000264005	0	0	0	0	0.114	0	0.720	0.954	0.987
CFHR3	FCN2	9606.ENSP00000356395	9606.ENSP00000291744	0	0	0	0	0.083	0.094	0	0.395	0.453
CFHR3	MASP2	9606.ENSP00000356395	9606.ENSP00000383690	0	0	0	0	0.072	0.046	0	0.420	0.442
COL15A1	FCN2	9606.ENSP00000364140	9606.ENSP00000291744	0	0	0	0.596	0	0	0	0.442	0.442
COL15A1	ECM1	9606.ENSP00000364140	9606.ENSP00000358045	0	0	0	0	0.084	0	0	0.372	0.400
CPD	RND3	9606.ENSP00000225719	9606.ENSP00000364886	0	0	0	0	0	0.162	0.500	0	0.563
CTH	HPD	9606.ENSP00000359976	9606.ENSP00000289004	0	0	0	0	0.214	0	0	0.289	0.418
CTH	EPHX2	9606.ENSP00000359976	9606.ENSP00000430269	0.107	0	0	0	0.072	0	0.105	0.350	0.453
CTH	PHGDH	9606.ENSP00000359976	9606.ENSP00000493382	0.057	0	0	0	0.235	0	0	0.474	0.588
CTH	TXNRD1	9606.ENSP00000359976	9606.ENSP00000434516	0	0	0	0	0.065	0	0.900	0.410	0.940
CXCL12	THY1	9606.ENSP00000379140	9606.ENSP00000284240	0	0	0	0	0.162	0	0	0.626	0.673
CXCL12	PLG	9606.ENSP00000379140	9606.ENSP00000308938	0	0	0	0	0	0	0	0.418	0.418
CXCL12	IGFBP3	9606.ENSP00000379140	9606.ENSP00000370473	0	0	0	0	0.086	0	0	0.591	0.610
CXCL12	SPP1	9606.ENSP00000379140	9606.ENSP00000378517	0	0	0	0	0.059	0	0	0.677	0.683
CYP4A11	HAO2	9606.ENSP00000311095	9606.ENSP00000354314	0	0	0	0	0.270	0	0.156	0.213	0.473
CYP4A11	EPHX2	9606.ENSP00000311095	9606.ENSP00000430269	0.059	0	0	0	0.061	0.068	0.104	0.536	0.596
DEFB1	LCN2	9606.ENSP00000297439	9606.ENSP00000362108	0	0	0	0	0.137	0	0	0.417	0.475
DPYS	HPD	9606.ENSP00000276651	9606.ENSP00000289004	0.045	0	0	0	0.255	0	0	0.291	0.451
ECM1	SPP2	9606.ENSP00000358045	9606.ENSP00000168148	0	0	0	0	0	0	0.400	0.213	0.507
ECM1	IGFBP3	9606.ENSP00000358045	9606.ENSP00000370473	0	0	0	0	0.128	0	0	0.504	0.549
ENO3	PLG	9606.ENSP00000324105	9606.ENSP00000308938	0	0	0	0	0.042	0	0	0.580	0.580
ENO3	PCK1	9606.ENSP00000324105	9606.ENSP00000319814	0	0	0	0	0.043	0	0.936	0.374	0.958
ENO3	FBP1	9606.ENSP00000324105	9606.ENSP00000408025	0	0	0	0	0.244	0	0	0.432	0.552
ENO3	TKT	9606.ENSP00000324105	9606.ENSP00000391481	0	0	0	0	0.326	0.192	0.800	0.292	0.912
EPHX2	HAO2	9606.ENSP00000430269	9606.ENSP00000354314	0.113	0	0	0	0.114	0	0.122	0.249	0.413
EPHX2	KMO	9606.ENSP00000430269	9606.ENSP00000355517	0.055	0	0	0	0.099	0	0.200	0.260	0.428
EPHX2	TXNRD1	9606.ENSP00000430269	9606.ENSP00000434516	0.084	0	0	0	0.055	0	0.202	0.281	0.437
F9	PLG	9606.ENSP00000218099	9606.ENSP00000308938	0	0	0.124	0.669	0.284	0	0	0.287	0.514
F9	HPX	9606.ENSP00000218099	9606.ENSP00000265983	0	0	0	0	0.313	0	0	0.384	0.559
F9	HRG	9606.ENSP00000218099	9606.ENSP00000232003	0	0	0	0	0.457	0.094	0	0.248	0.597
F9	FGA	9606.ENSP00000218099	9606.ENSP00000498441	0	0	0	0	0.247	0	0	0.505	0.611
F9	FCN2	9606.ENSP00000218099	9606.ENSP00000291744	0	0	0	0	0.217	0	0.540	0.188	0.682
F9	MASP2	9606.ENSP00000218099	9606.ENSP00000383690	0	0	0.130	0.683	0.236	0	0.540	0.114	0.693
F9	KLKB1	9606.ENSP00000218099	9606.ENSP00000264690	0	0	0.165	0.726	0.162	0.071	0.540	0.169	0.706
FBP1	LYZ	9606.ENSP00000408025	9606.ENSP00000261267	0	0	0	0	0.144	0	0	0.390	0.455
FBP1	PCK1	9606.ENSP00000408025	9606.ENSP00000319814	0	0	0	0	0.113	0	0	0.804	0.819
FBP1	HAO2	9606.ENSP00000408025	9606.ENSP00000354314	0	0	0	0	0.169	0	0.151	0.396	0.536
FBP1	TKT	9606.ENSP00000408025	9606.ENSP00000391481	0.102	0	0	0	0.301	0	0.942	0.538	0.981
FCN2	KLKB1	9606.ENSP00000291744	9606.ENSP00000264690	0	0	0	0	0.067	0	0.540	0.200	0.626
FCN2	PLG	9606.ENSP00000291744	9606.ENSP00000308938	0	0	0	0	0.117	0	0	0.519	0.557
FCN2	MASP2	9606.ENSP00000291744	9606.ENSP00000383690	0	0	0	0	0.118	0.783	0.720	0.989	0.999
FGA	SPP2	9606.ENSP00000498441	9606.ENSP00000168148	0	0	0	0	0.581	0	0	0.273	0.682
FGA	PON1	9606.ENSP00000498441	9606.ENSP00000222381	0	0	0	0	0.207	0	0	0.302	0.422
FGA	HRG	9606.ENSP00000498441	9606.ENSP00000232003	0	0	0	0	0.600	0.312	0	0.788	0.936
FGA	LYZ	9606.ENSP00000498441	9606.ENSP00000261267	0	0	0	0	0.116	0	0.400	0.759	0.861
FGA	PZP	9606.ENSP00000498441	9606.ENSP00000261336	0	0	0	0	0.159	0	0	0.466	0.532
FGA	LCAT	9606.ENSP00000498441	9606.ENSP00000264005	0	0	0	0	0.111	0	0	0.515	0.551
FGA	KLKB1	9606.ENSP00000498441	9606.ENSP00000264690	0	0	0	0	0.131	0	0	0.418	0.473
FGA	HPX	9606.ENSP00000498441	9606.ENSP00000265983	0	0	0	0	0.690	0	0	0.355	0.791
FGA	PLG	9606.ENSP00000498441	9606.ENSP00000308938	0	0	0	0	0.837	0	0	0.799	0.965
FGA	PROZ	9606.ENSP00000498441	9606.ENSP00000344458	0	0	0	0	0.162	0	0	0.328	0.413
FGA	FTCD	9606.ENSP00000498441	9606.ENSP00000380856	0	0	0	0	0.713	0	0	0.134	0.741
FTCD	HRG	9606.ENSP00000380856	9606.ENSP00000232003	0	0	0	0	0.425	0	0	0.126	0.477
FTCD	HPD	9606.ENSP00000380856	9606.ENSP00000289004	0	0	0	0	0.345	0	0	0.225	0.471
FTCD	PLG	9606.ENSP00000380856	9606.ENSP00000308938	0	0	0	0	0.477	0	0	0	0.477
GLYAT	HRG	9606.ENSP00000340200	9606.ENSP00000232003	0	0	0	0	0.423	0	0	0	0.423
GLYAT	PCK1	9606.ENSP00000340200	9606.ENSP00000319814	0	0	0	0	0.331	0	0	0.176	0.425
GLYAT	HAO2	9606.ENSP00000340200	9606.ENSP00000354314	0	0	0	0	0.363	0	0	0.167	0.447
GPC3	SPP1	9606.ENSP00000377836	9606.ENSP00000378517	0	0	0	0	0.072	0	0	0.454	0.471
GSTA1	NQO1	9606.ENSP00000335620	9606.ENSP00000319788	0	0	0	0	0.067	0	0	0.700	0.708
GSTA1	TXNRD1	9606.ENSP00000335620	9606.ENSP00000434516	0	0	0	0	0.056	0	0	0.490	0.498
HAO2	HPD	9606.ENSP00000354314	9606.ENSP00000289004	0.084	0	0	0	0.269	0	0.283	0.172	0.550
HAO2	PCK1	9606.ENSP00000354314	9606.ENSP00000319814	0	0	0	0	0.185	0	0	0.339	0.439
HBB	HPX	9606.ENSP00000494175	9606.ENSP00000265983	0	0	0	0	0	0.236	0.500	0.566	0.819
HPD	HRG	9606.ENSP00000289004	9606.ENSP00000232003	0	0	0	0	0.448	0	0	0.049	0.452
HPD	PLG	9606.ENSP00000289004	9606.ENSP00000308938	0	0	0	0	0.397	0	0	0.049	0.402
HPX	PON1	9606.ENSP00000265983	9606.ENSP00000222381	0	0	0	0	0.251	0	0	0.524	0.628
HPX	HRG	9606.ENSP00000265983	9606.ENSP00000232003	0	0	0	0	0.333	0	0	0.452	0.619
HPX	LCAT	9606.ENSP00000265983	9606.ENSP00000264005	0	0	0	0	0.146	0	0	0.468	0.527
HPX	LCN2	9606.ENSP00000265983	9606.ENSP00000362108	0	0	0	0	0.057	0	0	0.506	0.514
HPX	PLG	9606.ENSP00000265983	9606.ENSP00000308938	0	0	0	0	0.460	0	0	0.665	0.811
HRG	SPP2	9606.ENSP00000232003	9606.ENSP00000168148	0	0	0	0	0.379	0	0	0.398	0.610
HRG	PON1	9606.ENSP00000232003	9606.ENSP00000222381	0	0	0	0	0.413	0	0	0.322	0.585
HRG	PROZ	9606.ENSP00000232003	9606.ENSP00000344458	0	0	0	0	0.184	0.094	0	0.361	0.486
HRG	KLKB1	9606.ENSP00000232003	9606.ENSP00000264690	0	0	0	0	0.179	0.094	0	0.502	0.597
HRG	MASP2	9606.ENSP00000232003	9606.ENSP00000383690	0	0	0	0	0.462	0.094	0	0.253	0.604
HRG	PLG	9606.ENSP00000232003	9606.ENSP00000308938	0	0	0	0	0.781	0.094	0.900	0.997	0.999
HSPB1	PLG	9606.ENSP00000248553	9606.ENSP00000308938	0	0	0	0	0	0.294	0	0.206	0.416
IGFALS	PLG	9606.ENSP00000416683	9606.ENSP00000308938	0	0	0	0	0.127	0	0.400	0.211	0.551
IGFALS	IGFBP3	9606.ENSP00000416683	9606.ENSP00000370473	0	0	0	0	0	0.983	0.800	0.994	0.999
IGFBP3	PLG	9606.ENSP00000370473	9606.ENSP00000308938	0	0	0	0	0	0.292	0.400	0.728	0.874
IGFBP3	PODXL	9606.ENSP00000370473	9606.ENSP00000367817	0	0	0	0	0.126	0	0	0.419	0.470
IGFBP3	SHBG	9606.ENSP00000370473	9606.ENSP00000369816	0	0	0	0	0.055	0	0	0.665	0.669
IGFBP3	SPP1	9606.ENSP00000370473	9606.ENSP00000378517	0	0	0	0	0.068	0	0	0.399	0.415
KLKB1	PON1	9606.ENSP00000264690	9606.ENSP00000222381	0	0	0	0	0.120	0	0	0.392	0.442
KLKB1	MASP2	9606.ENSP00000264690	9606.ENSP00000383690	0	0	0.149	0.600	0.165	0	0.540	0.187	0.699
KLKB1	PLG	9606.ENSP00000264690	9606.ENSP00000308938	0	0	0.104	0.637	0.157	0	0.900	0.260	0.936
LCAT	PON1	9606.ENSP00000264005	9606.ENSP00000222381	0	0	0	0	0.099	0	0.720	0.874	0.965
LCAT	PROZ	9606.ENSP00000264005	9606.ENSP00000344458	0	0	0	0	0.112	0	0	0.490	0.528
LCN2	LYZ	9606.ENSP00000362108	9606.ENSP00000261267	0	0	0	0	0.097	0	0	0.515	0.544
LCN2	S100P	9606.ENSP00000362108	9606.ENSP00000296370	0	0	0	0	0.331	0.064	0	0.203	0.457
LCN2	SPP1	9606.ENSP00000362108	9606.ENSP00000378517	0	0	0	0	0.069	0	0	0.736	0.743
MASP2	PLG	9606.ENSP00000383690	9606.ENSP00000308938	0	0	0	0.597	0.366	0	0	0.141	0.432
NQO1	TXNRD1	9606.ENSP00000319788	9606.ENSP00000434516	0	0	0	0	0.211	0	0	0.761	0.803
PHGDH	TKT	9606.ENSP00000493382	9606.ENSP00000391481	0.052	0	0	0	0.110	0.078	0	0.334	0.413
PHGDH	RACGAP1	9606.ENSP00000493382	9606.ENSP00000404190	0	0	0	0	0.142	0	0	0.341	0.410
PHGDH	TXNRD1	9606.ENSP00000493382	9606.ENSP00000434516	0.042	0	0	0	0.066	0	0.312	0.268	0.489
PLCB1	PODXL	9606.ENSP00000338185	9606.ENSP00000367817	0	0	0	0	0.060	0	0	0.441	0.452
PLCB1	PTH1R	9606.ENSP00000338185	9606.ENSP00000402723	0	0	0	0	0	0	0	0.614	0.614
PLG	SPP2	9606.ENSP00000308938	9606.ENSP00000168148	0	0	0	0	0.442	0	0	0.063	0.455
PLG	PON1	9606.ENSP00000308938	9606.ENSP00000222381	0	0	0	0	0.193	0	0	0.586	0.651
PLG	THY1	9606.ENSP00000308938	9606.ENSP00000284240	0	0	0	0	0	0	0	0.489	0.489
PLG	SPINK1	9606.ENSP00000308938	9606.ENSP00000296695	0	0	0	0	0.047	0.107	0	0.417	0.460
PLG	SPP1	9606.ENSP00000308938	9606.ENSP00000378517	0	0	0	0	0	0	0	0.438	0.438
PLG	TKT	9606.ENSP00000308938	9606.ENSP00000391481	0	0	0	0	0.058	0.045	0	0.445	0.457
PLG	PROZ	9606.ENSP00000308938	9606.ENSP00000344458	0	0	0	0.564	0.304	0	0	0.269	0.470
PODXL	PTH1R	9606.ENSP00000367817	9606.ENSP00000402723	0	0	0	0	0.060	0	0	0.424	0.435
PROZ	SPP2	9606.ENSP00000344458	9606.ENSP00000168148	0	0	0	0	0.184	0	0	0.308	0.411
PTH1R	SPP1	9606.ENSP00000402723	9606.ENSP00000378517	0	0	0	0	0.067	0	0	0.422	0.438
PZP	SHBG	9606.ENSP00000261336	9606.ENSP00000369816	0	0	0	0	0.065	0	0	0.446	0.459
SPP1	THY1	9606.ENSP00000378517	9606.ENSP00000284240	0	0	0	0	0.143	0	0	0.580	0.624
TKT	TXNRD1	9606.ENSP00000391481	9606.ENSP00000434516	0	0	0	0	0.226	0.071	0.294	0.355	0.629
