# Supplementary material for: Exosome-Related FTCD Facilitates M1 Macrophage Polarization and Impacts the Prognosis of Hepatocellular Carcinoma
Source: Biomolecules. 2023 Dec 28;14(1):41. doi: 10.3390/biom14010041 (PMC10813691; doi:10.3390/biom14010041)
Supplement: Supplementary file 1 [file biomolecules-14-00041-s001.zip › Table S7 The clinical background data and gene expression value of HCC obtained from TCGA dataset.csv]

	Age	Sex	Race	T	N	M	Stage	New tumor	Smoking	Radiation	OS	Infection	Survival times (year)	Group (Grade)	FTCD expression value	HRG expression value	C8B expression value
TCGA-2Y-A9GV	54	FEMALE	WHITE	T1	NA	NA	I	Primary	NA	NO	1	HCV;HBV	6.936986301	G1(n=55)	8.83180079	10.51394995	9.767222679
TCGA-2Y-A9H0	49	MALE	WHITE	T3	N0	M0	III	NA	NA	NO	0	Unknown	10.06849315	G1(n=55)	5.318173441	9.663232991	7.577785008
TCGA-2Y-A9H3	45	MALE	WHITE	T2	NA	NA	II	Recurrence	NA	NO	0	HCV;HBV	4.153424658	G1(n=55)	8.739069814	9.696864403	7.710820856
TCGA-3K-AAZ8	65	MALE	BLACK	T3	NA	NA	III	Recurrence	NA	NO	0	Unknown	1.084931507	G1(n=55)	8.547208622	11.07995347	9.271993338
TCGA-5C-AAPD	61	MALE	ASIAN	T2	N0	M0	II	NA	NA	NO	0	HBV	0.054794521	G1(n=55)	5.849013405	7.7604686	8.885893975
TCGA-BC-A10S	81	MALE	WHITE	T3	NA	NA		Recurrence	NA	NA	1	Unknown	3.898630137	G1(n=55)	8.787845482	10.86634509	9.198223108
TCGA-BC-A10T	76	MALE	WHITE	T4	NA	NA		Recurrence	NA	NA	1	Not Available	2.293150685	G1(n=55)	6.880548168	12.2204852	9.564515379
TCGA-BC-A110	51	FEMALE	BLACK	T1	NA	NA		Recurrence	NA	NA	1	Not Available	5.797260274	G1(n=55)	8.396969498	10.13095557	9.357317856
TCGA-BC-A69I	69	MALE	WHITE	T1	N0	M0	I	NA	NA	NO	0	Not Available	1.060273973	G1(n=55)	8.407600105	9.511363832	9.314869242
TCGA-CC-5260	61	FEMALE	ASIAN	T4	N0	M0	III	NA	NA	NA	1	HCV;HBV	0.238356164	G1(n=55)	0.868072008	1.98889025	1.252328556
TCGA-CC-5262	67	MALE	ASIAN	T4	N0	M0	III	NA	NA	NA	1	HCV;HBV	0.282191781	G1(n=55)	6.422213271	9.474949874	8.388107606
TCGA-CC-5263	35	MALE	ASIAN	T3	N0	M0	III	NA	NA	NA	1	HCV;HBV	0.353424658	G1(n=55)	0.554898066	3.368928691	8.945582974
TCGA-CC-A123	24	FEMALE	ASIAN	T3	N0	M0	III	Primary	NA	NA	0	HCV;HBV	0.6	G1(n=55)	7.514775083	6.884173408	7.551433229
TCGA-CC-A3MB	36	MALE	ASIAN	T3	N0	M0	III	Primary	NA	NA	1	HCV;HBV	0.863013699	G1(n=55)	6.911289481	8.715556629	8.375328979
TCGA-CC-A7IF	59	MALE	ASIAN	T3	N0	M0	III	Primary	NA	NA	1	HCV;HBV	1.778082192	G1(n=55)	8.301860371	11.45728931	8.965619326
TCGA-CC-A7IH	58	MALE	ASIAN	T3	N0	M0	III	NA	NA	NA	0	HCV;HBV	1	G1(n=55)	8.886017748	10.28275814	9.255803136
TCGA-CC-A7IL	61	MALE	ASIAN	T3	N0	M0	III	Recurrence	NA	NA	1	HCV;HBV	0.761643836	G1(n=55)	8.521196408	10.10964194	7.92234028
TCGA-CC-A8HS	18	MALE	ASIAN	T3	N1	M0	III	Recurrence	NA	NA	1	HCV;HBV	0.821917808	G1(n=55)	8.884383792	5.368893266	6.869221622
TCGA-DD-A1ED	68	MALE	WHITE	T1	N0	M0	I	NA	NA	NA	0	HBV	6.304109589	G1(n=55)	8.293004285	9.698885746	9.212508288
TCGA-DD-A3A2	76	FEMALE	WHITE	T1	N0	M0	I	NA	NA	NA	1	Unknown	5.838356164	G1(n=55)	0.660774246	1.453334758	8.082033876
TCGA-DD-A4NL	46	MALE	WHITE	T1	N0	M0	I	NA	NA	NO	0	HBV	4.687671233	G1(n=55)	8.729890796	10.9218512	9.591886821
TCGA-DD-A4NO	65	MALE	WHITE	T1	N0	M0	I	Recurrence	NA	NO	0	HCV;HBV	6.150684932	G1(n=55)	8.982398819	10.44448288	8.825718726
TCGA-DD-A4NV	61	MALE	WHITE	T3	N0	M0	III	NA	NA	NO	0	HBV	6.569863014	G1(n=55)	8.341621567	10.7610774	8.623082083
TCGA-DD-A73C	65	FEMALE	WHITE	T3	N0	M0	III	Recurrence	NA	NO	0	HBV	1.920547945	G1(n=55)	1.103250185	5.27673711	9.251978859
TCGA-DD-A73D	68	FEMALE	WHITE	T2	NA	NA	II	Recurrence	NA	NO	0	HCV;HBV	1.898630137	G1(n=55)	8.681941394	11.04621378	8.047784627
TCGA-DD-A73E	66	MALE	WHITE	T1	N0	M0	I	NA	NA	NO	0	HBV	0.120547945	G1(n=55)	8.188119142	6.49042198	6.994623766
TCGA-DD-A73F	77	FEMALE	WHITE	T1	N0	M0	I	NA	NA	NO	0	Unknown	2.97260274	G1(n=55)	9.039386476	10.89129635	9.476887398
TCGA-DD-AAE4	49	FEMALE	ASIAN	T1	N0	M0	I	Recurrence	NA	NO	0	Unknown	1.665753425	G1(n=55)	8.47667168	11.1516626	9.659901944
TCGA-DD-AAVP	48	MALE	ASIAN	T1	N0	M0	I	Recurrence	NA	NO	0	Unknown	7.539726027	G1(n=55)	8.729041891	6.355995973	8.588235405
TCGA-EP-A12J	62	MALE	BLACK	T1	NA	NA	I	NA	NA	NA	0	Not Available	1.561643836	G1(n=55)	8.76779883	8.461810646	9.373496379
TCGA-FV-A2QR	75	MALE	WHITE	T1	N0	M0	I	Recurrence	NA	NA	1	Not Available	1.591780822	G1(n=55)	7.771525235	11.48828662	8.305363087
TCGA-G3-A5SK	58	MALE	WHITE	T1	NA	M0	I	Recurrence	NA	NO	0	Not Available	2.038356164	G1(n=55)	7.64421585	10.3800644	9.726373306
TCGA-G3-A7M7	65	MALE	WHITE	T1	NA	NA	I	NA	NA	NO	0	HCV;HBV	0.989041096	G1(n=55)	7.608981756	9.842290296	9.099888681
TCGA-G3-A7M8	31	MALE	ASIAN	T1	NA	NA	I	NA	NA	NO	0	HCV;HBV	1.178082192	G1(n=55)	8.755848145	10.2754016	9.485698102
TCGA-G3-AAV2	50	MALE	WHITE	T1	N0	M0	I	NA	NA	NO	0	HCV;HBV	1.019178082	G1(n=55)	8.056819601	8.344062204	7.708184448
TCGA-G3-AAV4	83	FEMALE	WHITE	T1	N0	M0	I	NA	NA	NO	1	Unknown	0.073972603	G1(n=55)	2.004825836	0.300922868	7.322807711
TCGA-K7-A5RF	64	MALE	WHITE	T1	NA	NA	I	Recurrence	NA	NO	0	HCV	1.728767123	G1(n=55)	9.023333894	10.915023	8.900673718
TCGA-K7-A5RG	66	MALE	BLACK	T1	NA	NA	I	NA	NA	NO	0	HCV	1.421917808	G1(n=55)	4.926783157	9.985112215	7.192934873
TCGA-KR-A7K0	65	MALE	WHITE	T1	N0	M0	I	NA	NA	NO	1	HCV	0.178082192	G1(n=55)	8.250386904	9.487963526	8.696350365
TCGA-KR-A7K2	64	MALE	WHITE	T1	N0	M0	I	NA	NA	NO	0	HCV	2.271232877	G1(n=55)	9.015929849	9.476477503	8.78850177
TCGA-KR-A7K7	61	FEMALE	WHITE	T2	N0	M0	II	Recurrence	NA	NO	0	Unknown	2.605479452	G1(n=55)	9.043694679	3.366237892	7.006865118
TCGA-KR-A7K8	57	MALE	NA	T1	N0	M0	I	NA	NA	NO	0	Unknown	2.482191781	G1(n=55)	7.16984046	10.08637728	9.082014421
TCGA-MI-A75I	61	MALE	BLACK	T2	NA	NA		NA	NA	NA	0	Unknown	1.726027397	G1(n=55)	2.616761619	9.904059508	6.725899245
TCGA-MR-A520	58	MALE	WHITE	T1	NA	NA	I	NA	NA	NA	0	HCV;HBV	0.62739726	G1(n=55)	9.12761262	10.9376249	8.487323085
TCGA-NI-A4U2	71	MALE	WHITE	T3	NA	NA	III	Recurrence	NA	NO	1	Unknown	4.906849315	G1(n=55)	1.771284531	2.770230357	8.73837064
TCGA-UB-AA0V	69	FEMALE	WHITE	NA	NA	NA	I	NA	NA	NO	0	HCV;HBV	0.860273973	G1(n=55)	8.643019093	10.73811783	9.197856676
TCGA-WX-AA46	61	MALE	WHITE	T2	NA	NA	II	NA	NA	NO	0	HCV	2.071232877	G1(n=55)	9.049062984	10.90514991	8.793025072
TCGA-XR-A8TE	16	MALE	WHITE	T3	N0	NA	III	Recurrence	NA	NO	0	Not Available	2.534246575	G1(n=55)	7.662163749	0.501314802	7.600882066
TCGA-XR-A8TF	74	MALE	WHITE	T1	NA	NA	I	Recurrence	NA	NO	1	Not Available	1.898630137	G1(n=55)	7.631769779	9.004939818	8.953809666
TCGA-ZP-A9CV	59	MALE	WHITE	T1	NA	NA		NA	NA	NO	1	Unknown	2.980821918	G1(n=55)	7.632133685	9.694295392	8.939819079
TCGA-ZP-A9CY	66	FEMALE	WHITE	T1	NA	NA		NA	NA	NO	0	Unknown	2.142465753	G1(n=55)	8.926899404	11.19016679	9.529777073
TCGA-ZP-A9CZ	72	MALE	ASIAN	T1	NA	NA		NA	NA	NO	0	HBV	1.934246575	G1(n=55)	7.296982981	11.34916877	8.148067996
TCGA-ZP-A9D0	67	FEMALE	BLACK	T1	NA	NA		NA	NA	NO	0	Unknown	2.989041096	G1(n=55)	9.012778819	10.66574956	10.23342196
TCGA-ZP-A9D4	64	FEMALE	WHITE	T1	NA	NA		NA	NA	NO	0	Unknown	1.082191781	G1(n=55)	8.026792902	9.489206448	8.74035776
TCGA-ZS-A9CE	79	FEMALE	WHITE	T2	NA	NA	II	Primary	NA	NO	0	HCV;HBV	3.4	G1(n=55)	8.192859567	10.77859073	8.898539378
TCGA-2Y-A9GS	58	MALE	WHITE	T2	NA	NA		Recurrence	NA	NO	1	HCV;HBV	1.983561644	G2(n=177)	6.098596297	9.815145107	8.78313094
TCGA-2Y-A9GT	51	MALE	WHITE	T1	NA	NA	I	Recurrence	NA	NO	1	HCV;HBV	4.449315068	G2(n=177)	8.52091033	10.74549625	9.664570851
TCGA-2Y-A9GU	55	FEMALE	WHITE	T1	NA	NA	I	NA	NA	NO	0	HCV;HBV	5.312328767	G2(n=177)	8.596720151	9.862663745	8.942066563
TCGA-2Y-A9GW	64	MALE	WHITE	T1	N0	NA	I	Recurrence	NA	NO	1	Unknown	3.482191781	G2(n=177)	7.918347003	9.224332947	8.396260805
TCGA-2Y-A9GX	68	MALE	WHITE	T1	NA	NA	I	Recurrence	NA	NO	0	HBV	6.690410959	G2(n=177)	7.537219823	10.52957508	8.495202983
TCGA-2Y-A9GZ	82	FEMALE	WHITE	T2	NA	NA	II	Recurrence	NA	NO	1	HCV;HBV	2.323287671	G2(n=177)	9.739370039	11.55932772	9.273864976
TCGA-2Y-A9H1	58	MALE	WHITE	T1	NA	NA	I	Recurrence	NA	NO	1	HCV	3.367123288	G2(n=177)	9.511573517	10.68994126	8.358535886
TCGA-2Y-A9H4	68	MALE	BLACK	T1	N0	NA	I	NA	NA	NO	0	HCV;HBV	3.978082192	G2(n=177)	8.453654081	10.86473884	9.619391258
TCGA-2Y-A9H6	68	FEMALE	WHITE	T1	NA	NA	I	NA	NA	NO	0	Unknown	0.978082192	G2(n=177)	7.941548529	11.03658666	7.75536817
TCGA-2Y-A9H7	81	FEMALE	WHITE	T1	N0	NA	I	Recurrence	NA	NO	0	HCV;HBV	3.2	G2(n=177)	8.61504282	9.649610328	7.820355354
TCGA-2Y-A9H8	85	FEMALE	WHITE	T1	NA	NA		Recurrence	NA	NO	1	HCV;HBV	1.734246575	G2(n=177)	8.526494105	7.375710828	9.326425449
TCGA-2Y-A9H9	70	MALE	WHITE	T1	N0	NA	I	Recurrence	NA	NO	0	Unknown	1.909589041	G2(n=177)	9.2866339	11.60352991	9.241925232
TCGA-2Y-A9HA	70	MALE	WHITE	T2	NA	NA	II	NA	NA	NO	1	HCV	0.098630137	G2(n=177)	7.620999244	9.715724819	7.758451976
TCGA-2Y-A9HB	66	MALE	NA	T1	NA	NA	I	NA	NA	NO	0	HCV	0.712328767	G2(n=177)	7.907637862	10.1351392	8.704528283
TCGA-4R-AA8I	66	MALE	WHITE	T2	NA	NA	II	Recurrence	NA	NO	1	HCV;HBV	0.717808219	G2(n=177)	0.206039741	11.02728425	9.201423104
TCGA-5C-A9VG	58	MALE	WHITE	T2	N0	M0	II	NA	NA	NO	0	Not Available	0.898630137	G2(n=177)	7.628627869	5.050531563	6.676000054
TCGA-5C-A9VH	70	MALE	WHITE	T1	N0	M0	I	NA	NA	NO	0	Not Available	0.882191781	G2(n=177)	8.647715871	10.163757	6.556375329
TCGA-5R-AA1C	57	MALE	WHITE	T2	N0	M0	II	NA	NA	NO	0	HCV;HBV	1.424657534	G2(n=177)	5.270433784	6.711525616	7.02018441
TCGA-5R-AAAM	65	FEMALE	WHITE	T2	N0	M0	II	NA	NA	NO	1	HCV;HBV	0.126027397	G2(n=177)	8.343586958	11.29444028	9.970237297
TCGA-BC-A10R	66	FEMALE	WHITE	T3	NA	NA		Recurrence	NA	NA	1	Not Available	0.843835616	G2(n=177)	7.482804634	11.99995193	10.35533597
TCGA-BC-A10U	69	MALE	WHITE	T2	NA	NA		Recurrence	NA	NA	1	Not Available	2.293150685	G2(n=177)	5.762553069	6.946636106	7.845486779
TCGA-BC-A10X	52	FEMALE	WHITE	T3	N0	NA	III	NA	NA	NA	1	Not Available	2.109589041	G2(n=177)	8.307923278	10.72389223	9.346741633
TCGA-BC-A10Z	62	FEMALE	WHITE	T1	N0	NA	I	NA	NA	NA	1	Unknown	0.093150685	G2(n=177)	7.809564827	11.8891582	8.007734497
TCGA-BC-A112	80	MALE	WHITE	T3	NA	NA		NA	NA	NA	1	Not Available	0.419178082	G2(n=177)	0.904925813	4.711340235	4.920905662
TCGA-BC-A216	62	FEMALE	WHITE	T3	NA	M0	III	NA	NA	NA	0	Not Available	3.701369863	G2(n=177)	6.676682713	9.53897547	9.343901786
TCGA-BC-A3KF	66	FEMALE	WHITE	T1	NA	M0	I	NA	NA	NA	0	Not Available	0.021917808	G2(n=177)	7.444938411	9.957185133	8.867145222
TCGA-BD-A2L6	69	MALE	WHITE	T2	NA	NA		Recurrence	NA	NA	0	HBV	3.734246575	G2(n=177)	8.139837816	9.637198745	8.535512726
TCGA-BD-A3EP	75	FEMALE	BLACK	T1	N0	M0	I	NA	NA	NA	0	Not Available	1.120547945	G2(n=177)	7.405033793	9.308289863	8.327865891
TCGA-BD-A3ER	62	MALE	WHITE	T2	NA	NA	II	Recurrence	NA	NA	0	HBV	3.054794521	G2(n=177)	8.075469356	10.50336732	9.105821471
TCGA-BW-A5NO	50	MALE	BLACK	T3	NA	NA	III	NA	NA	NO	0	Not Available	0.054794521	G2(n=177)	5.603112297	9.986875477	9.703132763
TCGA-CC-5258	48	MALE	ASIAN	T2	N0	M0	II	NA	NA	NA	1	HCV;HBV	0.353424658	G2(n=177)	7.439621033	7.332327258	7.338888688
TCGA-CC-5259	60	FEMALE	ASIAN	T4	N0	M0	III	Recurrence	NA	NA	0	HCV;HBV	0.684931507	G2(n=177)	5.950616409	9.026492205	8.062899228
TCGA-CC-5261	44	MALE	ASIAN	T2	N0	M0	II	NA	NA	NA	1	HCV;HBV	0.265753425	G2(n=177)	5.847406656	7.477454673	8.262288503
TCGA-CC-5264	71	MALE	ASIAN	T3	N0	M0	III	NA	NA	NA	1	HCV;HBV	0.279452055	G2(n=177)	0.149945065	8.093143016	9.775626264
TCGA-CC-A3MA	61	MALE	ASIAN	T3	N0	M0	III	Recurrence	NA	NA	1	HCV;HBV	0.830136986	G2(n=177)	5.146235061	7.414252572	7.229597467
TCGA-CC-A3MC	54	MALE	ASIAN	T3	N0	M0	III	Recurrence	NA	NA	0	HCV;HBV	0.994520548	G2(n=177)	6.554120983	9.790332487	9.04513619
TCGA-CC-A5UD	45	MALE	ASIAN	T3	N0	M0	III	Recurrence	NA	NA	1	HCV;HBV	0.832876712	G2(n=177)	5.481126731	2.124621861	3.103574325
TCGA-CC-A5UE	48	MALE	ASIAN	T4	N0	M0	III	Recurrence	NA	NA	1	HCV;HBV	0.745205479	G2(n=177)	8.227020365	10.33789394	8.676163404
TCGA-CC-A7IE	57	MALE	ASIAN	T3	N0	M0	III	Primary	NA	NA	1	HCV;HBV	0.594520548	G2(n=177)	7.196639494	7.735409964	5.2923155
TCGA-CC-A7IG	47	MALE	ASIAN	T2	N0	M0	II	Recurrence	NA	NA	1	HCV;HBV	0.819178082	G2(n=177)	6.367892343	6.685087106	7.551201992
TCGA-CC-A8HT	74	MALE	ASIAN	T3	N0	M0	III	Recurrence	NA	NA	1	HCV;HBV	0.383561644	G2(n=177)	6.5483985	8.032130331	7.381330319
TCGA-CC-A8HV	51	FEMALE	ASIAN	T2	N0	M0	II	Recurrence	NA	NA	1	HCV;HBV	0.764383562	G2(n=177)	6.679917947	4.203104057	8.255815697
TCGA-CC-A9FS	55	MALE	ASIAN	T2	N0	M0	II	Primary	NA	NA	0	HCV;HBV	0.578082192	G2(n=177)	7.253686943	10.67262281	9.503890275
TCGA-CC-A9FU	52	FEMALE	ASIAN	T3	N0	M0	III	NA	NA	NA	0	HCV;HBV	0	G2(n=177)	7.758332517	5.333535917	8.633155273
TCGA-CC-A9FV	57	MALE	ASIAN	T3	N0	M0	III	NA	NA	NA	0	HCV;HBV	0	G2(n=177)	0.409942664	0.10551928	0
TCGA-CC-A9FW	68	MALE	ASIAN	T3	N0	M0	III	Recurrence	NA	NA	0	HCV;HBV	0.679452055	G2(n=177)	7.371927227	1.684443765	7.047320092
TCGA-DD-A115	53	MALE	WHITE	T3	N0	M0	III	Recurrence	NA	NA	1	HBV	6.964383562	G2(n=177)	4.864754989	12.76419624	9.651886941
TCGA-DD-A118	77	FEMALE	WHITE	T2	N0	M0	II	Recurrence	NA	NA	0	HBV	9.416438356	G2(n=177)	6.858349299	10.72984361	9.059031304
TCGA-DD-A11B	73	MALE	WHITE	T1	N0	M0	I	NA	NA	NA	1	HBV	0.038356164	G2(n=177)	8.987300448	11.94627057	8.028845058
TCGA-DD-A11D	57	FEMALE	WHITE	T1	N0	M0	I	Recurrence	NA	NA	1	Unknown	4.273972603	G2(n=177)	7.598253252	10.86794305	7.993620434
TCGA-DD-A1EA	68	MALE	ASIAN	T2	N0	M0	II	Recurrence	NA	NA	0	HBV	6.616438356	G2(n=177)	7.272067176	8.0473789	8.43343573
TCGA-DD-A1EB	72	FEMALE	NA	T1	N0	M0	I	Recurrence	NA	NA	0	HBV	5.526027397	G2(n=177)	7.221778558	0.209431538	8.757407513
TCGA-DD-A1EI	46	MALE	ASIAN	T1	N0	M0	I	NA	NA	NA	0	HBV	0.501369863	G2(n=177)	7.920682775	10.78794838	8.310968248
TCGA-DD-A1EJ	71	FEMALE	WHITE	T1	N1	M0	III	Recurrence	NA	NA	1	HBV	2.753424658	G2(n=177)	7.008074135	8.707049221	7.058651669
TCGA-DD-A1EK	64	FEMALE	WHITE	T4	N0	M1	IV	Recurrence	NA	NO	1	HBV	1.528767123	G2(n=177)	6.559824941	8.964010645	8.926393369
TCGA-DD-A39W	29	FEMALE	WHITE	T3	N0	M0	III	NA	NA	NA	1	Unknown	2.265753425	G2(n=177)	8.06370283	1.561342724	6.567888817
TCGA-DD-A39X	78	FEMALE	WHITE	T1	NA	M0	I	Recurrence	NA	NA	1	HBV	4.64109589	G2(n=177)	7.270120774	8.152732631	7.748547487
TCGA-DD-A39Z	43	FEMALE	NA	T2	NA	M0	II	NA	NA	NA	1	Unknown	1.646575342	G2(n=177)	8.408667537	10.94650172	7.965328852
TCGA-DD-A3A1	65	MALE	NA	T3	N0	M0	III	NA	NA	NA	1	Unknown	0.638356164	G2(n=177)	8.36651739	10.74418005	9.142439211
TCGA-DD-A3A3	45	MALE	ASIAN	T1	N0	M0	I	NA	NA	NA	1	Not Available	1.465753425	G2(n=177)	7.560830056	10.17882606	7.980592305
TCGA-DD-A3A5	66	FEMALE	WHITE	T3	N0	M0	III	Recurrence	NA	NA	1	Unknown	8.561643836	G2(n=177)	8.727196726	12.2908391	9.852459571
TCGA-DD-A3A6	72	FEMALE	WHITE	T2	N0	M0	II	NA	NA	NA	1	HBV	8.926027397	G2(n=177)	0.91843941	1.65824799	1.138788178
TCGA-DD-A3A8	75	MALE	WHITE	T2	N0	M0	II	NA	NA	NA	1	HBV	0.030136986	G2(n=177)	8.197117384	9.408820537	8.25831056
TCGA-DD-A3A9	64	FEMALE	WHITE	T4	N0	M1	IV	Recurrence	NA	NA	1	Unknown	2.550684932	G2(n=177)	8.05857561	8.663451587	8.372820875
TCGA-DD-A4NB	25	MALE	WHITE	T1	N0	M0	I	Recurrence	NA	NO	0	Unknown	2.709589041	G2(n=177)	7.819052996	6.930123437	9.736498654
TCGA-DD-A4NF	72	MALE	WHITE	T1	N0	M0	I	Recurrence	NA	NO	0	HCV;HBV	2.580821918	G2(n=177)	7.29706585	5.175316393	8.004143296
TCGA-DD-A4NG	77	MALE	WHITE	T3	NA	M0	III	Recurrence	NA	NO	1	HBV	2.197260274	G2(n=177)	5.468017534	6.051060044	7.658866276
TCGA-DD-A4NI	67	MALE	WHITE	T2	NA	M0	II	NA	NA	NO	0	HBV	2.235616438	G2(n=177)	9.157063311	11.28584116	8.618014094
TCGA-DD-A4NJ	54	FEMALE	WHITE	T2	N0	M0	II	Recurrence	NA	NO	0	HBV	2.542465753	G2(n=177)	7.287099245	10.48671732	9.391526143
TCGA-DD-A4NK	80	FEMALE	WHITE	T3	N0	M0	III	Recurrence	NA	NO	1	HBV	3.315068493	G2(n=177)	7.996498229	10.33170533	8.964418235
TCGA-DD-A4NS	61	FEMALE	WHITE	T1	N0	M0	I	Recurrence	NA	NO	1	HBV	6.728767123	G2(n=177)	9.177733552	9.95825728	9.016322544
TCGA-DD-A73A	71	MALE	WHITE	T1	N0	M0	I	NA	NA	NO	0	HBV	1.994520548	G2(n=177)	9.058153451	11.0211135	8.253582156
TCGA-DD-A73B	72	FEMALE	WHITE	T1	N0	M0	I	Recurrence	NA	NO	1	HBV	0.775342466	G2(n=177)	7.039313007	10.83022698	7.666855771
TCGA-DD-AAC9	51	MALE	ASIAN	T1	N0	M0	I	NA	NA	NO	0	Unknown	0.950684932	G2(n=177)	8.160578991	9.772897362	8.566047636
TCGA-DD-AACC	61	MALE	ASIAN	T1	N0	M0	I	Recurrence	NA	NO	1	Unknown	4.616438356	G2(n=177)	8.287951306	9.740211243	8.117564943
TCGA-DD-AACJ	75	MALE	ASIAN	T2	N0	M0	II	Recurrence	NA	NO	0	Unknown	5.75890411	G2(n=177)	7.784238143	9.96868639	8.399481596
TCGA-DD-AACK	70	MALE	ASIAN	T1	N0	M0	I	NA	NA	NO	0	Unknown	0.024657534	G2(n=177)	7.894358361	9.317048616	7.775999483
TCGA-DD-AACT	69	FEMALE	ASIAN	T1	N0	M0	I	NA	NA	NO	0	Unknown	4.279452055	G2(n=177)	8.060261197	8.290105071	9.720082822
TCGA-DD-AAD0	73	FEMALE	ASIAN	T1	N0	M0	I	Recurrence	NA	NO	0	Unknown	0.375342466	G2(n=177)	8.023958701	9.227042994	8.365722943
TCGA-DD-AAD2	66	MALE	ASIAN	T1	N0	M0	I	NA	NA	NO	0	Unknown	1.802739726	G2(n=177)	7.068498343	10.49007304	8.856933489
TCGA-DD-AAD3	43	MALE	ASIAN	T1	N0	M0	I	NA	NA	NO	0	Unknown	3.547945205	G2(n=177)	8.016658518	11.37362137	8.686429782
TCGA-DD-AAD8	73	FEMALE	ASIAN	T1	N0	M0	I	NA	NA	NO	0	Unknown	3.339726027	G2(n=177)	7.574166411	9.981972401	9.308264352
TCGA-DD-AADS	63	MALE	ASIAN	T1	N0	M0	I	NA	NA	NO	0	Unknown	1.298630137	G2(n=177)	9.010219389	10.27834382	8.134656132
TCGA-DD-AADY	55	FEMALE	ASIAN	T1	N0	M0	I	NA	NA	NO	0	Unknown	1.520547945	G2(n=177)	5.775552614	12.44612578	9.64026181
TCGA-DD-AAE3	50	MALE	ASIAN	T1	N0	M0	I	NA	NA	NO	0	Unknown	1.550684932	G2(n=177)	8.217541687	10.29688975	7.765948113
TCGA-DD-AAE6	59	FEMALE	ASIAN	T1	N0	M0	I	Recurrence	NA	NO	0	Unknown	0.38630137	G2(n=177)	6.979851496	7.225727729	7.439600169
TCGA-DD-AAE7	72	MALE	ASIAN	T1	N0	M0	I	NA	NA	NO	0	Unknown	1.764383562	G2(n=177)	8.185520331	12.44522695	8.432743042
TCGA-DD-AAEB	60	MALE	ASIAN	T1	N0	M0	I	NA	NA	NO	0	Unknown	1.309589041	G2(n=177)	8.625023188	9.649590375	8.389608993
TCGA-DD-AAEH	73	MALE	ASIAN	T1	N0	M0	I	Recurrence	NA	NO	0	Unknown	2.147945205	G2(n=177)	8.589056524	10.65625496	9.228285762
TCGA-DD-AAEI	72	MALE	ASIAN	T1	N0	M0	I	Recurrence	NA	NO	0	Unknown	4.194520548	G2(n=177)	7.979418217	10.66345723	8.520375381
TCGA-DD-AAVQ	38	MALE	ASIAN	T1	N0	M0	I	Recurrence	NA	NO	0	Unknown	7.473972603	G2(n=177)	8.307598983	7.89826195	7.466266811
TCGA-DD-AAVR	44	MALE	ASIAN	T1	N0	M0	I	NA	NA	NO	0	Unknown	6.884931507	G2(n=177)	7.341950653	10.77085118	8.430194249
TCGA-DD-AAVS	56	MALE	ASIAN	T1	N0	M0	I	NA	NA	NO	0	Unknown	4.994520548	G2(n=177)	7.78258856	10.36121466	6.531779826
TCGA-DD-AAVU	46	MALE	ASIAN	T2	N0	M0	II	Recurrence	NA	NO	0	Unknown	6.032876712	G2(n=177)	9.072204094	8.58063593	7.822942924
TCGA-DD-AAVW	35	MALE	ASIAN	T1	N0	M0	I	NA	NA	NO	0	Unknown	6.347945205	G2(n=177)	7.602230256	11.76650394	6.405550923
TCGA-DD-AAVX	38	MALE	ASIAN	T2	N0	M0	II	Recurrence	NA	NO	0	Unknown	4.706849315	G2(n=177)	7.840654142	8.695166046	9.357424166
TCGA-DD-AAVY	56	MALE	ASIAN	T3	N0	M0	III	NA	NA	NO	0	Unknown	5.397260274	G2(n=177)	8.589971104	10.14026015	8.37488635
TCGA-DD-AAVZ	38	MALE	ASIAN	T1	N0	M0	I	NA	NA	NO	0	Unknown	5.205479452	G2(n=177)	7.776068416	10.72244349	7.676541264
TCGA-DD-AAW0	54	MALE	ASIAN	T1	N0	M0	I	NA	NA	NO	0	Unknown	5.520547945	G2(n=177)	7.713934461	11.91153014	9.045004546
TCGA-DD-AAW1	55	MALE	ASIAN	T3	N0	M0	III	NA	NA	NO	0	Unknown	5.449315068	G2(n=177)	6.879462472	6.199881685	8.727786384
TCGA-DD-AAW2	69	MALE	ASIAN	T1	N0	M0	I	Recurrence	NA	NO	0	Unknown	5.082191781	G2(n=177)	7.443660031	9.725440008	9.452925761
TCGA-DD-AAW3	69	MALE	ASIAN	T1	N0	M0	I	NA	NA	NO	0	Unknown	4.473972603	G2(n=177)	7.651452812	9.896572064	8.890870627
TCGA-ED-A459	47	MALE	ASIAN	T2	N0	M0	II	NA	NA	NO	0	HBV	2.493150685	G2(n=177)	5.49496957	8.109911296	10.48471323
TCGA-ED-A5KG	60	FEMALE	ASIAN	T2	N0	M0	II	Primary	NA	NO	0	HBV	2.339726027	G2(n=177)	6.821291788	4.743330267	6.049043032
TCGA-ED-A627	74	MALE	WHITE	T1	NA	M0	I	NA	NA	NA	0	HCV;HBV	1.15890411	G2(n=177)	8.223056908	9.989977634	9.265366461
TCGA-ED-A7PZ	61	MALE	ASIAN	T2	NA	M0	II	NA	NA	NO	0	HBV	0.016438356	G2(n=177)	4.845690649	3.496123558	7.418785105
TCGA-ED-A7XO	29	MALE	ASIAN	T3	N0	M0	III	Recurrence	NA	NO	0	HCV;HBV	1.169863014	G2(n=177)	9.171310287	10.65990326	9.753657788
TCGA-ED-A82E	60	FEMALE	ASIAN	T3	N0	M0	III	NA	NA	NO	0	HCV;HBV	1.117808219	G2(n=177)	0.72815075	2.801988036	0.557606655
TCGA-ED-A97K	54	MALE	ASIAN	T3	N0	M0	III	NA	NA	NO	0	HBV	0.016438356	G2(n=177)	6.299274967	7.935794699	8.845945784
TCGA-EP-A26S	70	MALE	WHITE	T1	N0	NA	I	NA	NA	NA	0	Not Available	1.665753425	G2(n=177)	7.350365967	8.337876926	9.032649632
TCGA-EP-A2KB	46	FEMALE	WHITE	T1	NA	NA	I	Recurrence	NA	NA	1	Not Available	1.632876712	G2(n=177)	7.570807795	9.049835923	6.806292461
TCGA-EP-A3JL	76	MALE	WHITE	T1	NA	NA	I	NA	NA	NA	0	Not Available	0.830136986	G2(n=177)	6.653099271	9.706148288	8.475412825
TCGA-EP-A3RK	73	MALE	WHITE	T3	NA	NA	III	Recurrence	NA	NA	0	Not Available	0.994520548	G2(n=177)	5.570401215	5.858815095	8.45792159
TCGA-ES-A2HS	80	MALE	WHITE	T1	NA	NA	I	NA	NA	NA	1	Not Available	1.884931507	G2(n=177)	10.51274492	10.85182575	8.228628742
TCGA-ES-A2HT	54	MALE	BLACK	T1	NA	NA	I	NA	NA	NA	1	Not Available	1.2	G2(n=177)	7.585426664	10.00673766	8.914346757
TCGA-FV-A2QQ	80	MALE	WHITE	T1	N0	NA	I	NA	NA	NA	0	Not Available	1.997260274	G2(n=177)	7.408233194	11.14734267	6.801458198
TCGA-FV-A3I0	76	FEMALE	WHITE	T2	NA	M0	II	Recurrence	NA	NA	0	Not Available	2.323287671	G2(n=177)	1.628089382	2.032330385	6.575013609
TCGA-FV-A3I1	81	FEMALE	WHITE	T2	N0	NA	II	NA	NA	NA	1	HCV;HBV	0.676712329	G2(n=177)	8.28259287	10.43609337	8.687953162
TCGA-FV-A3R3	38	FEMALE	WHITE	T1	NA	NA	I	NA	NA	NA	1	Not Available	1.002739726	G2(n=177)	6.843429335	8.70050417	8.55854299
TCGA-FV-A495	51	FEMALE	WHITE	T2	NA	M0	II	NA	NA	NA	0	Not Available	0.002739726	G2(n=177)	8.990275129	10.16898819	8.910705361
TCGA-FV-A496	84	FEMALE	WHITE	T1	NA	M0	I	NA	NA	NA	0	Not Available	0.02739726	G2(n=177)	7.249572974	11.16583412	8.604583227
TCGA-FV-A4ZP	78	MALE	WHITE	T3	NA	M0	III	NA	NA	NA	1	Not Available	6.810958904	G2(n=177)	6.700482475	6.14053352	6.152247911
TCGA-FV-A4ZQ	52	MALE	WHITE	T1	NA	M0	I	NA	NA	NA	0	HCV	0.032876712	G2(n=177)	7.817688868	2.057481722	6.536551915
TCGA-G3-A25S	64	MALE	WHITE	T1	N0	M0	I	Recurrence	NA	NA	1	Not Available	1.139726027	G2(n=177)	8.117805887	7.728136007	7.175553256
TCGA-G3-A25T	45	FEMALE	WHITE	T3	N0	M0	III	Recurrence	NA	NA	0	Not Available	4.254794521	G2(n=177)	5.600272961	5.999652381	6.607110121
TCGA-G3-A25V	68	MALE	WHITE	T1	N0	M0	I	Recurrence	NA	NA	0	Not Available	2.356164384	G2(n=177)	8.657250294	10.92946521	9.00393617
TCGA-G3-A25Z	58	MALE	ASIAN	T1	N0	M0	I	NA	NA	NA	0	Not Available	1.794520548	G2(n=177)	7.716291767	10.45119904	9.345405627
TCGA-G3-A3CG	80	MALE	WHITE	T1	N0	M0	I	Recurrence	NA	NA	0	Not Available	1.843835616	G2(n=177)	8.570727091	10.38663837	9.285422881
TCGA-G3-A3CH	53	MALE	ASIAN	T3	N0	M0	III	Recurrence	NA	NA	0	Not Available	2.136986301	G2(n=177)	7.459179439	11.43861599	9.355979062
TCGA-G3-A3CI	71	MALE	WHITE	T1	N0	M0	I	NA	NA	NA	0	Not Available	0.493150685	G2(n=177)	7.675925061	10.79767508	7.69132911
TCGA-G3-A3CJ	52	MALE	AMERICAN INDIAN	T2	N0	M0	II	Recurrence	NA	NA	0	Not Available	1.62739726	G2(n=177)	8.806703698	9.543879898	7.479207658
TCGA-G3-A3CK	61	MALE	ASIAN	T1	N0	M0	I	NA	NA	NA	0	Not Available	1.602739726	G2(n=177)	8.105895883	8.275733075	8.288001117
TCGA-G3-A5SI	44	MALE	ASIAN	T2	N0	M0	II	Recurrence	NA	NO	1	Not Available	2.104109589	G2(n=177)	7.117755009	11.57938649	10.17186256
TCGA-G3-A5SJ	59	MALE	WHITE	T1	NA	M0	I	Recurrence	NA	NO	0	Not Available	1.912328767	G2(n=177)	6.202967351	11.00743916	8.861167677
TCGA-G3-A5SL	70	MALE	WHITE	T2	NA	M0	II	NA	NA	NO	0	Not Available	1.701369863	G2(n=177)	7.950401314	10.31657792	8.991350308
TCGA-G3-A6UC	65	MALE	WHITE	T3	N0	M0	III	Recurrence	NA	NO	0	HCV;HBV	1.838356164	G2(n=177)	9.085549288	10.80333752	9.194402832
TCGA-G3-A7M5	76	MALE	ASIAN	T1	NA	NA	I	NA	NA	NO	0	HCV;HBV	1.224657534	G2(n=177)	8.711836878	10.1329744	8.584460234
TCGA-G3-A7M9	70	MALE	WHITE	T3	NA	NA	III	NA	NA	NO	1	HCV;HBV	0.153424658	G2(n=177)	5.869079352	4.914725906	6.802598913
TCGA-G3-AAUZ	48	MALE	NA	T1	N0	M0	I	NA	NA	NO	0	HCV;HBV	1.315068493	G2(n=177)	10.12452287	10.51472164	9.268190638
TCGA-G3-AAV0	58	MALE	ASIAN	T1	N0	M0	I	NA	NA	NO	0	HCV;HBV	1.304109589	G2(n=177)	9.389976036	10.07390979	8.563421297
TCGA-G3-AAV3	58	FEMALE	WHITE	T2	N0	M0	II	NA	NA	NO	0	Unknown	1.128767123	G2(n=177)	7.232143047	4.35953966	7.749640336
TCGA-G3-AAV5	67	MALE	WHITE	T2	N0	M0	II	Recurrence	NA	YES	0	HCV;HBV	0.969863014	G2(n=177)	8.79618253	10.09873635	4.436236711
TCGA-G3-AAV7	38	MALE	ASIAN	T2	N0	M0	II	NA	NA	NO	0	HBV	0.989041096	G2(n=177)	3.520015415	1.689527983	8.25769752
TCGA-GJ-A3OU	59	MALE	WHITE	T1	NA	NA	I	Recurrence	NA	NO	0	HCV	2.408219178	G2(n=177)	7.012122887	8.381827287	7.2305049
TCGA-GJ-A6C0	75	FEMALE	WHITE	T2	NA	NA	II	NA	NA	NO	1	Not Available	0.084931507	G2(n=177)	6.470373023	7.854140271	8.286307816
TCGA-GJ-A9DB	68	MALE	WHITE	T1	N0	NA	I	NA	NA	NO	1	Not Available	0.183561644	G2(n=177)	7.789401606	11.19217736	7.508984207
TCGA-HP-A5MZ	78	MALE	NA	T1	NA	M0	I	NA	NA	NO	1	HCV;HBV	0.249315068	G2(n=177)	7.948112847	10.58399196	8.162240371
TCGA-K7-A6G5	66	MALE	WHITE	T1	N0	NA	I	NA	NA	NO	0	HCV	1.402739726	G2(n=177)	8.671815086	11.21632343	8.912092285
TCGA-K7-AAU7	61	MALE	WHITE	T2	NA	NA	II	Recurrence	NA	NO	0	Unknown	0.983561644	G2(n=177)	5.755837043	8.730637116	7.024564342
TCGA-LG-A6GG	79	FEMALE	WHITE	T2	NA	M0	II	NA	NA	NO	0	Not Available	1.060273973	G2(n=177)	7.19197819	9.676988029	9.048742464
TCGA-LG-A9QC	48	MALE	WHITE	T1	NA	M0	I	NA	NA	NA	0	Not Available	1.164383562	G2(n=177)	7.634322179	9.119954618	5.531213632
TCGA-LG-A9QD	68	MALE	WHITE	T3	N0	M0	III	NA	NA	NO	0	Not Available	1.002739726	G2(n=177)	8.642990789	11.33742468	9.634032656
TCGA-MI-A75E	61	MALE	WHITE	T4	N0	M0	III	NA	NA	NO	0	HCV	1.389041096	G2(n=177)	8.481481167	10.42155072	8.888341034
TCGA-MI-A75G	63	MALE	WHITE	T2	N0	M0	II	NA	NA	NO	0	HCV	1.912328767	G2(n=177)	9.440505498	10.18251059	8.464150304
TCGA-O8-A75V	54	MALE	NA	T1	NA	NA	I	NA	NA	NO	0	Unknown	1.473972603	G2(n=177)	8.36886623	10.68820303	8.689290359
TCGA-PD-A5DF	58	FEMALE	WHITE	T4	N0	M0	III	NA	NA	NO	1	Unknown	1.750684932	G2(n=177)	1.610165722	11.1467144	9.17436346
TCGA-QA-A7B7	48	MALE	BLACK	T2	NA	NA	II	Recurrence	NA	NO	0	Unknown	0.257534247	G2(n=177)	7.920552488	10.42027521	8.356128212
TCGA-RC-A6M4	74	FEMALE	WHITE	T3	NA	NA	III	NA	NA	NA	0	Not Available	0.060273973	G2(n=177)	8.385653107	10.17832763	7.960408379
TCGA-RC-A6M5	20	FEMALE	WHITE	T1	N1	M0	IV	NA	NA	NA	0	Not Available	0.04109589	G2(n=177)	7.398728429	6.277965712	9.498609101
TCGA-RC-A7SB	53	MALE	ASIAN	T2	N0	M0	II	NA	NA	NO	0	Not Available	1.610958904	G2(n=177)	8.011870119	12.07462201	7.645567834
TCGA-RC-A7SF	66	MALE	ASIAN	T1	N0	M0	I	Recurrence	NA	NO	0	Not Available	1.58630137	G2(n=177)	7.945755479	10.84775359	8.099580635
TCGA-RG-A7D4	69	MALE	BLACK	T2	N0	M0	II	NA	NA	NO	0	HCV	3.008219178	G2(n=177)	5.734666832	6.606116901	6.526230125
TCGA-T1-A6J8	68	MALE	WHITE	T1	NA	M0		NA	NA	NA	0	Unknown	0.063013699	G2(n=177)	6.855202592	11.43568908	8.58383164
TCGA-UB-A7MA	62	FEMALE	WHITE	T2	N0	M0	II	Recurrence	NA	NO	0	HCV;HBV	2.323287671	G2(n=177)	2.293493399	7.429296908	5.340176254
TCGA-UB-A7ME	51	MALE	ASIAN	T1	NA	NA	I	NA	NA	NO	0	HBV	1.331506849	G2(n=177)	7.87083239	11.00868678	8.520149026
TCGA-UB-A7MF	56	MALE	WHITE	T3	NA	NA	III	Recurrence	NA	NO	1	HCV;HBV	0.58630137	G2(n=177)	7.52366592	7.875941663	8.14862919
TCGA-UB-AA0U	60	MALE	WHITE	T2	NA	NA	II	Recurrence	NA	NO	0	HCV;HBV	0.895890411	G2(n=177)	7.969362103	10.14088639	9.394975616
TCGA-WJ-A86L	68	FEMALE	WHITE	T1	NA	NA	I	NA	NA	NO	0	HCV;HBV	0.945205479	G2(n=177)	6.850096872	9.48123158	8.82519788
TCGA-WQ-AB4B	62	MALE	WHITE	T2	NA	M0	II	Recurrence	NA	NO	0	Unknown	1.082191781	G2(n=177)	8.134926048	9.327647617	8.698023304
TCGA-WX-AA47	33	FEMALE	WHITE	T3	NA	NA	III	Recurrence	NA	YES	1	HCV	1.523287671	G2(n=177)	4.241084431	0.364895951	7.908180939
TCGA-XR-A8TC	43	FEMALE	WHITE	T1	NA	NA	I	NA	NA	NO	0	Not Available	3.668493151	G2(n=177)	7.967225643	8.676190715	7.718443233
TCGA-XR-A8TG	58	MALE	WHITE	T1	NA	M0	I	Recurrence	NA	NO	0	Not Available	2.460273973	G2(n=177)	7.691878843	12.3216778	9.670846269
TCGA-ZP-A9D1	56	FEMALE	WHITE	T1	NA	NA		NA	NA	NO	0	Unknown	0.057534247	G2(n=177)	7.301871811	9.396296555	8.798158017
TCGA-ZP-A9D2	51	MALE	WHITE	T2	NA	NA		Recurrence	NA	NO	1	HCV	2.095890411	G2(n=177)	3.910894935	7.931911529	7.068758493
TCGA-ZS-A9CD	73	MALE	WHITE	T2	NA	NA	II	Recurrence	NA	NO	1	HCV;HBV	3.797260274	G2(n=177)	8.453858888	9.460600002	8.652727489
TCGA-ZS-A9CF	64	MALE	WHITE	T2	NA	NA	II	Recurrence	NA	NO	0	HCV;HBV	6.608219178	G2(n=177)	9.270159993	11.06136971	9.818267719
TCGA-ZS-A9CG	55	MALE	WHITE	T2	NA	NA	II	NA	NA	NO	0	HCV;HBV	0.934246575	G2(n=177)	9.058415746	8.938527011	8.398415372
TCGA-2V-A95S	NA	MALE	ASIAN	T2	NA	NA	II	NA	NA	NO	NA	Unknown	NA	G3 and G4(n=134)	5.916589752	11.59139702	4.896336049
TCGA-2Y-A9GY	64	FEMALE	WHITE	T2	NA	NA	II	Recurrence	NA	NO	1	Unknown	2.073972603	G3 and G4(n=134)	6.908046039	4.615217532	6.998985006
TCGA-2Y-A9H2	64	FEMALE	WHITE	T1	N0	NA	I	NA	NA	NO	0	HCV;HBV	4.742465753	G3 and G4(n=134)	7.119597061	7.709535484	7.125204347
TCGA-2Y-A9H5	59	FEMALE	WHITE	T1	N0	NA	I	Recurrence	NA	NO	1	HCV	1.520547945	G3 and G4(n=134)	7.855664368	9.563978488	7.455249802
TCGA-5R-AA1D	17	FEMALE	WHITE	T3	N0	M0	III	NA	NA	YES	0	HCV;HBV	1.230136986	G3 and G4(n=134)	5.309302176	6.129343239	9.390074933
TCGA-BC-4072	74	FEMALE	WHITE	T3	N0	M0	III	Recurrence	NA	NA	1	Not Available	4.082191781	G3 and G4(n=134)	6.679842261	10.41470111	8.011194745
TCGA-BC-4073	73	MALE	WHITE	T3	N0	NA	III	NA	NA	NA	0	Not Available	2.326027397	G3 and G4(n=134)	5.935847203	6.481407872	7.978570587
TCGA-BC-A10W	50	MALE	ASIAN	T4	NA	NA		NA	NA	NA	1	HBV	0.249315068	G3 and G4(n=134)	5.732792218	10.37225359	8.263573109
TCGA-BC-A10Y	76	MALE	WHITE	T4	NA	NA		Recurrence	NA	NA	1	Not Available	1.947945205	G3 and G4(n=134)	7.014489283	11.47766873	9.10505804
TCGA-BC-A217	75	FEMALE	WHITE	T2	NA	M0	II	NA	NA	NA	1	Not Available	3.82739726	G3 and G4(n=134)	8.112275637	9.885664818	8.283317956
TCGA-BC-A3KG	68	FEMALE	WHITE	T2	N0	M0	II	Recurrence	NA	NA	0	Not Available	1.863013699	G3 and G4(n=134)	4.171359617	9.837456624	4.476977545
TCGA-BC-A5W4	69	MALE	WHITE	T3	NA	M0	III	Recurrence	NA	NO	1	Not Available	1.498630137	G3 and G4(n=134)	1.785029841	9.848084864	9.716757087
TCGA-BC-A69H	64	MALE	WHITE	T2	NA	M0	II	NA	NA	NO	0	Not Available	1.216438356	G3 and G4(n=134)	7.519324427	7.038614614	5.763934882
TCGA-BC-A8YO	66	FEMALE	WHITE	T4	N0	M0	III	Recurrence	NA	NO	0	Not Available	1.539726027	G3 and G4(n=134)	8.599001479	9.596077351	8.10600571
TCGA-BW-A5NP	26	FEMALE	WHITE	T2	N0	M1	IV	Recurrence	NA	NO	0	Not Available	0	G3 and G4(n=134)	7.741897117	4.475962207	7.08043048
TCGA-BW-A5NQ	63	MALE	WHITE	T1	NA	NA	I	NA	NA	NA	0	Not Available	0	G3 and G4(n=134)	5.696854005	5.585618752	5.851997736
TCGA-CC-A1HT	50	MALE	ASIAN	T3	N0	M0	III	NA	NA	NA	1	HCV;HBV	0.276712329	G3 and G4(n=134)	0.5248485	7.585192709	2.979360368
TCGA-CC-A3M9	45	MALE	ASIAN	T3	N0	M0	III	Recurrence	NA	NA	1	HCV;HBV	0.821917808	G3 and G4(n=134)	0.552527012	0.4478466	0.366966363
TCGA-CC-A5UC	63	MALE	ASIAN	T3	N0	M0	III	Primary	NA	NA	1	HCV;HBV	0.950684932	G3 and G4(n=134)	7.25659772	7.184691353	6.416759019
TCGA-CC-A7II	54	MALE	ASIAN	T3	N0	M0	III	Recurrence	NA	NA	0	HCV;HBV	1.093150685	G3 and G4(n=134)	1.635434279	0.015695955	1.001818096
TCGA-CC-A7IJ	56	MALE	ASIAN	T2	N0	M0	II	NA	NA	NA	0	HCV;HBV	1.046575342	G3 and G4(n=134)	1.659474869	0.164430675	0.263187212
TCGA-CC-A7IK	59	MALE	ASIAN	T3	N0	M0	III	Recurrence	NA	NA	1	HCV;HBV	0.717808219	G3 and G4(n=134)	6.455160257	5.927603197	6.498405025
TCGA-CC-A8HU	39	FEMALE	ASIAN	T3	N0	M0	III	Recurrence	NA	NA	1	HCV;HBV	0.942465753	G3 and G4(n=134)	7.58565382	8.850519367	8.201207721
TCGA-DD-A113	55	FEMALE	WHITE	T2	N0	M0	II	Recurrence	NA	NA	0	HBV	6.643835616	G3 and G4(n=134)	7.418581617	12.34532416	7.553237112
TCGA-DD-A114	42	MALE	BLACK	T2	NA	M0	II	NA	NA	NA	1	HCV;HBV	3.147945205	G3 and G4(n=134)	4.922412547	6.773673677	6.44316937
TCGA-DD-A116	68	MALE	ASIAN	T3	N0	M0	III	Recurrence	NA	NA	1	HBV	4.443835616	G3 and G4(n=134)	6.909015836	7.103167088	8.145769817
TCGA-DD-A119	40	MALE	ASIAN	T3	N0	M1	IV	NA	NA	NA	1	HBV	0.610958904	G3 and G4(n=134)	7.442639699	9.983125303	8.102952445
TCGA-DD-A11A	67	MALE	BLACK	T1	N0	M0	I	NA	NA	NA	0	HBV	0.216438356	G3 and G4(n=134)	6.717701313	11.54139668	8.124216336
TCGA-DD-A11C	69	MALE	WHITE	T1	N0	M0	I	NA	NA	NA	0	HBV	1.81369863	G3 and G4(n=134)	7.393313595	10.27378337	10.22321114
TCGA-DD-A1EC	20	FEMALE	WHITE	T1	N0	M0	I	Recurrence	NA	NA	0	Unknown	1.649315068	G3 and G4(n=134)	6.204809023	0.127629405	4.463896313
TCGA-DD-A1EE	73	MALE	WHITE	T3	N0	M0	III	Recurrence	NA	NA	1	HCV;HBV	0.956164384	G3 and G4(n=134)	7.804970748	9.437907097	7.174704248
TCGA-DD-A1EF	57	FEMALE	WHITE	T1	N0	M0	I	NA	NA	NA	1	HBV	1.079452055	G3 and G4(n=134)	8.223048214	6.369512949	7.254716109
TCGA-DD-A1EG	76	MALE	WHITE	T1	N0	M0	I	Recurrence	NA	NO	1	HBV	3.75890411	G3 and G4(n=134)	7.153684225	10.88529569	8.451781655
TCGA-DD-A1EH	23	MALE	WHITE	T3	N0	M0	III	Recurrence	NA	NA	0	HBV	4.095890411	G3 and G4(n=134)	6.755010712	6.716586513	7.37175521
TCGA-DD-A1EL	23	MALE	BLACK	T2	N0	M0	II	NA	NA	NA	1	HBV	1.136986301	G3 and G4(n=134)	4.614674802	2.769506969	6.6153468
TCGA-DD-A39V	77	MALE	WHITE	T2	NA	M0	II	Recurrence	NA	NA	1	Not Available	1.761643836	G3 and G4(n=134)	2.706215437	5.213991471	8.343236733
TCGA-DD-A39Y	67	MALE	ASIAN	T1	NA	M0	I	NA	NA	NA	1	HBV	0.468493151	G3 and G4(n=134)	7.917732359	8.911648815	8.100459134
TCGA-DD-A3A4	37	MALE	WHITE	T3	N0	M0	III	Recurrence	NA	NA	1	Not Available	1.676712329	G3 and G4(n=134)	6.79452266	6.259301771	8.394634391
TCGA-DD-A3A7	67	MALE	NA	T3	N0	M0	III	Recurrence	NA	NO	1	HBV	1.147945205	G3 and G4(n=134)	7.611692037	6.957997906	5.417968452
TCGA-DD-A4NA	67	FEMALE	WHITE	T2	N1	M0	III	NA	NA	NA	0	HBV	2.761643836	G3 and G4(n=134)	4.946987904	2.081807665	7.022427789
TCGA-DD-A4ND	56	FEMALE	WHITE	T1	N0	M0	I	Primary	NA	NO	0	Unknown	7.523287671	G3 and G4(n=134)	7.69829644	7.359575182	8.858525381
TCGA-DD-A4NE	75	FEMALE	WHITE	T3	N0	M0	III	Recurrence	NA	NO	1	HCV;HBV	1.808219178	G3 and G4(n=134)	9.098112905	10.05509986	9.168952837
TCGA-DD-A4NH	65	FEMALE	WHITE	T3	N0	M0	III	Recurrence	NA	NO	0	HBV	2.512328767	G3 and G4(n=134)	8.434150208	3.448432689	7.334303634
TCGA-DD-A4NN	56	FEMALE	WHITE	T1	N0	M0	I	Recurrence	NA	NO	1	Unknown	2.463013699	G3 and G4(n=134)	8.557979669	7.187083503	7.981725502
TCGA-DD-A4NP	32	MALE	WHITE	T1	N0	M0	I	Recurrence	NA	NO	0	HBV	9.063013699	G3 and G4(n=134)	8.106341528	8.525387107	9.305737406
TCGA-DD-A4NQ	60	MALE	WHITE	T2	N0	M0	II	Recurrence	NA	NO	1	HCV;HBV	1.021917808	G3 and G4(n=134)	6.423414741	7.420838919	7.699416133
TCGA-DD-A4NR	85	FEMALE	WHITE	T1	N0	M0	I	NA	NA	NO	1	HBV	0.024657534	G3 and G4(n=134)	7.114611965	8.92607326	7.533154095
TCGA-DD-A73G	73	FEMALE	WHITE	T1	N0	M0	I	NA	NA	NO	0	HBV	9.528767123	G3 and G4(n=134)	8.512101213	8.862117635	8.304974763
TCGA-DD-AA3A	81	FEMALE	WHITE	T1	N0	NA	I	NA	NA	NO	1	HBV	1.123287671	G3 and G4(n=134)	4.103871736	4.26891516	3.318011366
TCGA-DD-AAC8	72	MALE	ASIAN	T1	N0	M0	I	NA	NA	NO	1	Unknown	0.043835616	G3 and G4(n=134)	1.129010256	1.49579185	6.513027796
TCGA-DD-AACA	65	MALE	ASIAN	T1	N0	M0	I	Recurrence	NA	NO	0	Unknown	6.304109589	G3 and G4(n=134)	7.07504346	6.089005247	8.511289883
TCGA-DD-AACB	74	FEMALE	ASIAN	T1	N0	M0	I	NA	NA	NO	0	Unknown	6.367123288	G3 and G4(n=134)	7.882250573	6.423011497	6.520592482
TCGA-DD-AACD	48	MALE	ASIAN	T1	N0	M0	I	Recurrence	NA	NO	1	Unknown	1.043835616	G3 and G4(n=134)	6.444050086	6.966097463	9.112258839
TCGA-DD-AACE	62	MALE	ASIAN	T1	N0	M0	I	Recurrence	NA	NO	0	Unknown	5.983561644	G3 and G4(n=134)	7.531843557	10.44728884	8.579554569
TCGA-DD-AACF	68	MALE	ASIAN	T1	N0	M0	I	Recurrence	NA	NO	1	Unknown	1	G3 and G4(n=134)	6.879023869	10.38180788	9.365038084
TCGA-DD-AACG	52	MALE	ASIAN	T2	N0	M0	II	Recurrence	NA	NO	1	Unknown	1.284931507	G3 and G4(n=134)	6.816126736	8.650988825	8.037385898
TCGA-DD-AACH	69	MALE	ASIAN	T2	N0	M0	II	Recurrence	NA	NO	1	Unknown	0.534246575	G3 and G4(n=134)	8.825508519	5.726215456	6.193978557
TCGA-DD-AACI	69	MALE	ASIAN	T2	N0	M0	II	Recurrence	NA	NO	0	Unknown	4.432876712	G3 and G4(n=134)	8.221493163	9.348621728	8.878168451
TCGA-DD-AACL	66	FEMALE	ASIAN	T1	N0	M0	I	NA	NA	NO	1	Unknown	0.293150685	G3 and G4(n=134)	4.915268424	7.363808988	5.912152208
TCGA-DD-AACN	32	MALE	ASIAN	T1	N0	M0	I	Recurrence	NA	NO	0	Unknown	3.567123288	G3 and G4(n=134)	8.444297972	8.492632296	8.368841446
TCGA-DD-AACO	40	MALE	ASIAN	T1	N0	M0	I	Recurrence	NA	NO	0	Unknown	5.139726027	G3 and G4(n=134)	8.07604703	10.42617746	9.157818762
TCGA-DD-AACP	64	MALE	ASIAN	T1	N0	M0	I	NA	NA	NO	0	Unknown	1.136986301	G3 and G4(n=134)	6.434592852	6.581324038	5.776616104
TCGA-DD-AACQ	50	MALE	ASIAN	T2	N0	M0	II	Recurrence	NA	NO	1	Unknown	1.183561644	G3 and G4(n=134)	9.035627232	9.314701752	8.505810907
TCGA-DD-AACS	39	MALE	ASIAN	T1	N0	M0	I	NA	NA	NO	0	Unknown	4.942465753	G3 and G4(n=134)	7.3177176	11.66961174	9.63950843
TCGA-DD-AACU	59	MALE	ASIAN	T1	N0	M0	I	NA	NA	NO	0	Unknown	4.293150685	G3 and G4(n=134)	8.050693299	11.21187894	8.177740666
TCGA-DD-AACV	53	MALE	ASIAN	T1	N0	M0	I	Recurrence	NA	NO	0	Unknown	4.194520548	G3 and G4(n=134)	8.383854295	11.88912756	9.458731932
TCGA-DD-AACW	43	MALE	ASIAN	T1	N0	M0	I	NA	NA	NO	0	Unknown	3.901369863	G3 and G4(n=134)	8.976481528	9.948586818	6.847858544
TCGA-DD-AACX	66	MALE	ASIAN	T2	N0	M0	II	Recurrence	NA	NO	0	Unknown	0.465753425	G3 and G4(n=134)	7.53108228	2.777116728	7.591239101
TCGA-DD-AACY	61	MALE	ASIAN	T1	N0	M0	I	Recurrence	NA	NO	0	Unknown	3.97260274	G3 and G4(n=134)	6.977633498	10.98614584	10.06183364
TCGA-DD-AACZ	63	FEMALE	ASIAN	T1	N0	M0	I	Recurrence	NA	NO	1	Unknown	0.468493151	G3 and G4(n=134)	7.223238131	4.553405243	6.615444183
TCGA-DD-AAD1	51	FEMALE	ASIAN	T1	N0	M0	I	Recurrence	NA	NO	0	Unknown	1.545205479	G3 and G4(n=134)	7.736693113	11.93147191	8.05843782
TCGA-DD-AAD5	54	MALE	ASIAN	T1	N0	M0	I	Recurrence	NA	NO	0	Unknown	3.684931507	G3 and G4(n=134)	5.922126498	3.414609242	6.788179929
TCGA-DD-AAD6	66	MALE	ASIAN	T3	N0	M0	III	Recurrence	NA	NO	0	Unknown	1.84109589	G3 and G4(n=134)	5.729287465	9.406332573	7.846740907
TCGA-DD-AADA	66	FEMALE	ASIAN	T1	N0	M0	I	NA	NA	NO	0	Unknown	3.378082192	G3 and G4(n=134)	8.62277798	10.20415514	8.293877216
TCGA-DD-AADB	51	MALE	ASIAN	T1	N0	M0	I	NA	NA	NO	0	Unknown	3.402739726	G3 and G4(n=134)	6.669439495	7.510123921	7.006811381
TCGA-DD-AADC	53	MALE	ASIAN	T1	N0	M0	I	Recurrence	NA	NO	1	Unknown	1.164383562	G3 and G4(n=134)	6.350310118	7.756631651	6.684191994
TCGA-DD-AADD	51	MALE	ASIAN	T1	N0	M0	I	NA	NA	NO	0	Unknown	3.37260274	G3 and G4(n=134)	7.159427914	7.804277379	6.814529597
TCGA-DD-AADF	64	FEMALE	ASIAN	T1	N0	M0	I	NA	NA	NO	1	Unknown	0.315068493	G3 and G4(n=134)	9.246115888	8.005399426	8.039839924
TCGA-DD-AADG	70	MALE	ASIAN	T3	N0	M0	III	Recurrence	NA	NO	0	Unknown	3.136986301	G3 and G4(n=134)	7.909651598	10.24725753	8.302836279
TCGA-DD-AADI	43	FEMALE	ASIAN	T1	N0	M0	I	NA	NA	NO	0	Unknown	2.97260274	G3 and G4(n=134)	7.834785718	7.484136971	7.98829678
TCGA-DD-AADJ	70	FEMALE	ASIAN	T1	N0	M0	I	NA	NA	NO	0	Unknown	2.920547945	G3 and G4(n=134)	7.600944397	10.75652619	6.609804323
TCGA-DD-AADK	68	FEMALE	ASIAN	T2	N0	M0	II	NA	NA	NO	0	Unknown	2.873972603	G3 and G4(n=134)	7.00436656	11.37534759	9.062872384
TCGA-DD-AADL	58	MALE	ASIAN	T1	N0	M0	I	NA	NA	NO	0	Unknown	1.742465753	G3 and G4(n=134)	6.783190499	11.05385696	9.246817854
TCGA-DD-AADM	58	MALE	ASIAN	T2	N0	M0	II	NA	NA	NO	1	Unknown	0.032876712	G3 and G4(n=134)	7.524476673	10.7583071	7.851600643
TCGA-DD-AADN	59	MALE	ASIAN	T1	NA	NA	I	NA	NA	NO	0	Unknown	2.460273973	G3 and G4(n=134)	7.004782984	6.353744103	3.978029356
TCGA-DD-AADO	55	MALE	ASIAN	T1	N0	M0	I	NA	NA	NO	0	Unknown	1.24109589	G3 and G4(n=134)	8.257750953	6.745222952	7.289694077
TCGA-DD-AADP	45	MALE	ASIAN	T1	N0	M0	I	NA	NA	NO	0	Unknown	1.254794521	G3 and G4(n=134)	7.667118474	12.41712433	9.597948639
TCGA-DD-AADQ	59	MALE	ASIAN	T2	N0	M0	II	NA	NA	NO	0	Unknown	1.194520548	G3 and G4(n=134)	7.4273131	7.809558547	9.359791399
TCGA-DD-AADR	58	MALE	ASIAN	T1	N0	M0	I	Recurrence	NA	NO	0	Unknown	5.556164384	G3 and G4(n=134)	6.774502661	10.45991522	8.945905125
TCGA-DD-AADU	60	MALE	ASIAN	T2	N0	M0	II	NA	NA	NO	0	Unknown	1.517808219	G3 and G4(n=134)	8.265750234	6.001932134	6.8866287
TCGA-DD-AADV	50	MALE	ASIAN	T1	N0	M0	I	NA	NA	NO	0	Unknown	1.57260274	G3 and G4(n=134)	7.707811134	11.93103377	9.639235775
TCGA-DD-AADW	48	MALE	ASIAN	T1	N0	M0	I	Recurrence	NA	NO	0	Unknown	1.608219178	G3 and G4(n=134)	6.494327035	8.145274653	7.202340243
TCGA-DD-AAE0	45	FEMALE	ASIAN	T3	N0	M0	III	NA	NA	NO	0	Unknown	1.520547945	G3 and G4(n=134)	5.005571441	5.657796104	5.284991244
TCGA-DD-AAE1	52	MALE	ASIAN	T1	N0	M0	I	NA	NA	NO	0	Unknown	1.512328767	G3 and G4(n=134)	8.416166124	10.65900006	6.60469151
TCGA-DD-AAE2	51	MALE	ASIAN	T1	N0	M0	I	NA	NA	NO	0	Unknown	1.747945205	G3 and G4(n=134)	8.730331751	11.512817	9.561759871
TCGA-DD-AAE9	69	MALE	ASIAN	T1	N0	M0	I	NA	NA	NO	0	Unknown	1.978082192	G3 and G4(n=134)	3.500270776	1.666669249	6.792959691
TCGA-DD-AAEA	65	MALE	ASIAN	T1	N0	M0	I	NA	NA	NO	0	Unknown	1.575342466	G3 and G4(n=134)	8.226589174	9.086562747	7.581384129
TCGA-DD-AAED	51	MALE	ASIAN	T1	N0	M0	I	Recurrence	NA	NO	0	Unknown	2.090410959	G3 and G4(n=134)	7.748426382	10.84846325	7.298692133
TCGA-DD-AAEE	55	MALE	ASIAN	T1	N0	M0	I	Recurrence	NA	NO	0	Unknown	2.219178082	G3 and G4(n=134)	7.170009843	8.860022088	7.10975908
TCGA-DD-AAEG	59	FEMALE	ASIAN	T1	N0	M0	I	NA	NA	NO	0	Unknown	1.969863014	G3 and G4(n=134)	6.900857136	10.5347955	8.922747566
TCGA-DD-AAEK	51	MALE	ASIAN	T2	N0	M0	II	NA	NA	NO	0	Unknown	2.923287671	G3 and G4(n=134)	8.103529059	10.75351711	8.45334336
TCGA-DD-AAVV	56	MALE	ASIAN	T2	N0	M0	II	NA	NA	NO	0	Unknown	6.726027397	G3 and G4(n=134)	6.245342926	9.378380858	9.424815537
TCGA-ED-A4XI	58	MALE	ASIAN	T2	N0	M0	II	NA	NA	NO	0	HBV	2.243835616	G3 and G4(n=134)	8.394117891	11.29825657	9.460364249
TCGA-ED-A66X	35	MALE	ASIAN	T3	N0	M0	III	Recurrence	NA	NO	0	HBV	1.112328767	G3 and G4(n=134)	7.019735104	6.308440137	7.143257899
TCGA-ED-A66Y	51	FEMALE	ASIAN	T3	N0	M0	III	NA	NA	NO	1	HBV	0.810958904	G3 and G4(n=134)	7.753996484	9.980132516	8.209967643
TCGA-ED-A7PX	48	FEMALE	ASIAN	T2	NA	M0	II	NA	NA	NO	0	HBV	0.016438356	G3 and G4(n=134)	2.126954912	6.449022541	6.344350022
TCGA-ED-A7PY	20	FEMALE	ASIAN	T2	NA	M0	II	NA	NA	NO	0	HBV	1.068493151	G3 and G4(n=134)	8.030293822	9.491516368	7.950632337
TCGA-ED-A7XP	53	FEMALE	ASIAN	T2	N0	M0	II	Recurrence	NA	NO	0	HBV	1.095890411	G3 and G4(n=134)	7.23415917	9.916429026	7.110482538
TCGA-ED-A8O5	59	FEMALE	ASIAN	T3	N0	M0	III	NA	NA	NO	0	HCV;HBV	1.112328767	G3 and G4(n=134)	7.618149549	10.03204203	7.09854315
TCGA-ED-A8O6	50	FEMALE	ASIAN	T3	N0	M0	III	NA	NA	NO	1	HCV;HBV	0.153424658	G3 and G4(n=134)	7.779097025	6.494274047	7.450751819
TCGA-EP-A2KA	52	FEMALE	WHITE	T3	NA	NA	III	Recurrence	NA	NA	1	Not Available	1.717808219	G3 and G4(n=134)	7.268485176	10.32251175	8.436644323
TCGA-EP-A2KC	62	MALE	BLACK	T1	NA	NA	I	NA	NA	NA	1	Not Available	0.052054795	G3 and G4(n=134)	7.290551299	10.07789419	7.632891408
TCGA-G3-A25U	63	FEMALE	ASIAN	T1	N0	M0	I	NA	NA	NA	0	Not Available	4.482191781	G3 and G4(n=134)	9.14545643	11.6210953	8.82790921
TCGA-G3-A25X	73	MALE	ASIAN	T2	N0	M0	II	NA	NA	NA	0	Not Available	4.873972603	G3 and G4(n=134)	5.891453227	6.857949777	6.552933859
TCGA-G3-A25Y	52	FEMALE	ASIAN	T1	N0	M0	I	Recurrence	NA	NA	1	Not Available	1.238356164	G3 and G4(n=134)	6.766280998	8.470562438	8.582046324
TCGA-G3-A5SM	58	MALE	WHITE	T2	NA	M0	II	Recurrence	NA	NO	0	Not Available	1.424657534	G3 and G4(n=134)	6.776387549	10.15454496	8.338411563
TCGA-G3-A7M6	60	FEMALE	WHITE	T1	NA	NA	I	Recurrence	NA	NO	0	Unknown	1.731506849	G3 and G4(n=134)	5.831709477	9.194897345	6.62002988
TCGA-G3-AAV1	51	MALE	ASIAN	T4	N0	M0	III	Recurrence	NA	NO	1	HCV;HBV	0.983561644	G3 and G4(n=134)	6.965202475	9.39677461	8.305151932
TCGA-G3-AAV6	53	FEMALE	WHITE	T3	N0	M0	III	Recurrence	NA	NO	1	HBV	0.178082192	G3 and G4(n=134)	7.871994324	3.063001331	5.868793676
TCGA-MI-A75C	64	MALE	WHITE	T1	N0	M0	I	NA	NA	NO	0	HBV	0.797260274	G3 and G4(n=134)	7.965518598	9.080472909	7.465376306
TCGA-MR-A8JO	34	MALE	WHITE	T1	N0	NA	I	NA	NA	NO	0	HCV;HBV	0.904109589	G3 and G4(n=134)	5.32549775	5.279719247	7.830454485
TCGA-NI-A8LF	74	MALE	WHITE	T1	NA	NA	I	NA	NA	NO	0	Unknown	2.189041096	G3 and G4(n=134)	7.855683756	8.731750437	8.179138408
TCGA-RC-A6M3	24	MALE	AMERICAN INDIAN	T2	N0	M0	II	NA	NA	NA	0	Not Available	0	G3 and G4(n=134)	1.709885133	1.699133117	7.754938007
TCGA-RC-A6M6	75	MALE	WHITE	T2	NA	M0	II	NA	NA	NA	0	Not Available	0.024657534	G3 and G4(n=134)	6.253743344	3.691837002	6.404416587
TCGA-RC-A7S9	47	FEMALE	ASIAN	T1	N0	M0	I	NA	NA	NO	0	Not Available	1.753424658	G3 and G4(n=134)	7.208780599	9.114851965	8.819097641
TCGA-RC-A7SH	42	MALE	ASIAN	T2	N0	M0	II	Recurrence	NA	NO	0	Not Available	1.282191781	G3 and G4(n=134)	8.264900128	8.032376043	6.895171723
TCGA-RC-A7SK	59	MALE	ASIAN	T1	N0	M0	I	Recurrence	NA	NO	0	Not Available	1.293150685	G3 and G4(n=134)	9.356727326	11.90173264	7.792760548
TCGA-UB-A7MB	24	MALE	WHITE	T2	NA	NA	II	Recurrence	NA	NO	0	HCV;HBV	1.646575342	G3 and G4(n=134)	3.289669538	11.06480706	7.564798788
TCGA-UB-A7MC	59	MALE	WHITE	T3	N0	NA	III	Recurrence	NA	NO	0	HCV;HBV	1.369863014	G3 and G4(n=134)	6.966439354	7.859743867	7.540743939
TCGA-UB-A7MD	67	MALE	BLACK	T1	N0	NA	I	NA	NA	NO	1	HCV;HBV	0.142465753	G3 and G4(n=134)	7.271289757	9.664445874	7.693319132
TCGA-WQ-A9G7	71	FEMALE	WHITE	T3	NA	M0		NA	NA	NO	0	Unknown	0.082191781	G3 and G4(n=134)	8.083041826	8.218282822	6.503001534
TCGA-WX-AA44	64	FEMALE	WHITE	T1	NA	NA	I	Recurrence	NA	YES	0	HCV	1.684931507	G3 and G4(n=134)	8.645620616	10.46944918	8.791362505
TCGA-XR-A8TD	49	FEMALE	WHITE	T3	N0	M0	III	NA	NA	NO	0	Not Available	2.821917808	G3 and G4(n=134)	7.017494546	7.743082757	7.895333916
TCGA-YA-A8S7	68	MALE	WHITE	T3	N0	NA	III	Recurrence	NA	NO	1	Unknown	1.128767123	G3 and G4(n=134)	4.922979667	5.85452858	7.501278033
TCGA-BC-A10Q	72	FEMALE	WHITE	T2	NA	NA		Recurrence	NA	NA	1	Not Available	3.109589041	NA	0.988735864	0.79703996	1.164516186
TCGA-FV-A23B	70	FEMALE	WHITE	T2	N0	M0	II	Recurrence	NA	NA	1	Not Available	5.073972603	NA	7.000572245	7.337526903	8.844980517
TCGA-FV-A3R2	75	MALE	WHITE	T1	NA	NA	I	NA	NA	NO	1	HCV;HBV	0.531506849	NA	7.841481808	10.46276448	9.027567988
TCGA-HP-A5N0	90	FEMALE	NA	NA	NA	M0		Recurrence	NA	NO	1	Unknown	3.142465753	NA	8.330781918	11.25134472	10.27945443
TCGA-MI-A75H	77	MALE	WHITE	NA	NA	NA		Recurrence	NA	NO	0	HCV	2.046575342	NA	7.573158064	7.627757734	9.231551161
